# Supplementary material for: Proteomic Investigation in Plasma from Women with Fibromyalgia in Response to a 15-wk Resistance Exercise Intervention
Source: PubMed Central journal article supplement (PMC8754090; doi:10.1249/mss.0000000000002790), 2021-09-22
Supplement: msse-54-232-s001.pdf [file msse-54-232-s001.pdf]

# Proteomic investigation in plasma from women with fibromyalgia in response to a 15-week resistance exercise intervention

Karin Wåhlén<sup>1</sup>, Hong Yan<sup>2</sup>, Charlotte Welinder<sup>3</sup>, Malin Ernberg<sup>4</sup>, Eva Kosek<sup>5</sup>, Kaisa Mannerkorpi<sup>6</sup>, Björn Gerdle<sup>1</sup>, Bijar Ghafouri<sup>1</sup>.

1. Pain and Rehabilitation Centre, and Department of Health, Medicine and Caring Sciences, Linköping University, Linköping, SWEDEN

2. BioMS, Lund University, BMC D13, SE-22184, Lund, SWEDEN

3. Department of Clinical Sciences Lund, Division of Oncology, Lund University, 221 85, Lund, SWEDEN

4. Department of Dental Medicine, Karolinska Institutet, and Scandinavian Centre for Orofacial Neurosciences (SCON), Huddinge, SWEDEN

5. Department of Clinical Neuroscience, Karolinska Institutet, Stockholm, SWEDEN and Department of Surgical Sciences, Uppsala University, Uppsala, SWEDEN

6. Department of Neuroscience and Physiology, Section of Health and Rehabilitation, Physiotherapy, Sahlgrenska Academy, University of Gothenburg, Gothenburg, SWEDEN

Correspondence:

Karin Wåhlén

Pain and Rehabilitation Centre, and Department of Health, Medicine and Caring Sciences,  
Linköping University,  
581 85 Linköping,  
Sweden

Email: [karin.wahlen@liu.se](mailto:karin.wahlen@liu.se)

Phone: +46 10 103 41 55

## Supplementary Digital Content (SDC)

### Clinical and exercise-related data

#### Post exercise FM vs. CON

Post exercise compared to CON, FM had significant higher pain intensity (VAS), fatigue (MFI all subscales), FIQ total score, pain catastrophizing thoughts (PCS), and psychological distress (HADS total). Further, significant reduced PPT was found in FM compared to CON. No significance difference in pain acceptance (CPAQ) was seen between the two groups (SDC Table 1).

Post exercise, FM had significant reduced physical capacity compared to CON as described by the variables SixMWT and handgrip force (both sides). No significant differences were found between the two groups in the variables knee extension force and elbow strength (both sides) (SDC Table 1).

#### Baseline vs. post exercise in CON

The CON group significantly improved their physical fatigue, walking distance, knee extension force, and handgrip force on the left side after 15 weeks of resistance exercise (SDC Table 1).

**SDC Table 1.** Presented data includes participants who performed 15-week resistance exercise, and which plasma samples were analyzed with proteomics at both time points. FM = 21, CON= 24. These data have been published elsewhere although not the same number of participants [11, 20].

| Variables                             | Baseline/post exercise         | FM/CON (n included in test) | FM Median (IQR)          | CON Median (IQR)         | P-value between groups |
|---------------------------------------|--------------------------------|-----------------------------|--------------------------|--------------------------|------------------------|
| <b>Background data</b>                |                                |                             |                          |                          |                        |
| Age (years)                           | Baseline                       | 21/24                       | 50.0 (16.5)              | 53.0 (18.8)              | 0.927 <sup>a</sup>     |
| BMI (kg/m <sup>2</sup> )              | Baseline                       | 21/24                       | 25.3 (5.5)               | 24.3 (5.6)               | 0.172 <sup>a</sup>     |
| FM duration (years)                   | Baseline                       | 21                          | 10.0 (11.0)              | -                        | -                      |
| Tender points (n)                     | Baseline                       | 21                          | 16.0 (2.0)               | -                        | -                      |
| Systolic blood pressure (mmHg)        | Baseline                       | 20/24                       | 122.5 (35.0)             | 125.5 (20.8)             | 0.895 <sup>b</sup>     |
| Diastolic blood pressure (mmHg)       | Baseline                       | 20/24                       | 85.0 (15.0)              | 85.0 (11.5)              | 0.935 <sup>b</sup>     |
| <b>Pain characteristics variables</b> |                                |                             |                          |                          |                        |
| VAS global pain (0-100)               | Baseline                       | 21/24                       | 54.0 (36.0)              | 0.0 (0.0)                | < 0.001 <sup>a</sup>   |
|                                       | Post                           | 21/24                       | 35.0 (36.5)              | 0.0 (0.0)                | < 0.001 <sup>a</sup>   |
|                                       | <i>P</i> -value with-in groups |                             | <b>0.031<sup>c</sup></b> | 0.465 <sup>c</sup>       |                        |
| CPAQ total (0-120)                    | Baseline                       | 21/12                       | 62.0 (25.5)              | 85.5 (42.5)              | < 0.01 <sup>b</sup>    |
|                                       | Post                           | 21/15                       | 75.0 (25.0)              | 73.0 (39.0)              | 0.429 <sup>b</sup>     |
|                                       | <i>P</i> -value with-in groups |                             | <b>0.011<sup>d</sup></b> | 0.255 <sup>d</sup>       |                        |
| <b>MFI (4-20)</b>                     |                                |                             |                          |                          |                        |
| General fatigue                       | Baseline                       | 21/24                       | 19.0 (3.0)               | 7.5 (5.0)                | < 0.001 <sup>a</sup>   |
|                                       | Post                           | 21/24                       | 18.0 (4.5)               | 7.0 (7.8)                | < 0.001 <sup>a</sup>   |
|                                       | <i>P</i> -value with-in groups |                             | <b>0.046<sup>c</sup></b> | 0.309 <sup>c</sup>       |                        |
| Physical fatigue                      | Baseline                       | 21/24                       | 16.0 (3.5)               | 6.5 (4.0)                | < 0.001 <sup>a</sup>   |
|                                       | Post                           | 21/24                       | 14.0 (6.0)               | 5.0 (3.8)                | < 0.001 <sup>a</sup>   |
|                                       | <i>P</i> -value with-in groups |                             | 0.095 <sup>c</sup>       | <b>0.049<sup>c</sup></b> |                        |
| Mental fatigue                        | Baseline                       | 21/24                       | 17.0 (3.5)               | 6.0 (5.5)                | < 0.001 <sup>a</sup>   |
|                                       | Post                           | 21/24                       | 15.0 (7.0)               | 7.0 (3.0)                | < 0.001 <sup>a</sup>   |
|                                       | <i>P</i> -value with-in groups |                             | <b>0.024<sup>c</sup></b> | 0.624 <sup>c</sup>       |                        |

|                                                        |                        |       |                            |                            |                             |
|--------------------------------------------------------|------------------------|-------|----------------------------|----------------------------|-----------------------------|
| Reduced activity                                       | Baseline               | 21/24 | 16.0 (6.5)                 | 5.0 (3.5)                  | < <b>0.001</b> <sup>a</sup> |
|                                                        | Post                   | 21/24 | 15.0 (6.5)                 | 6.5 (3.0)                  | < <b>0.001</b> <sup>a</sup> |
|                                                        | p-value with-in groups |       | 0.120 <sup>c</sup>         | 0.390 <sup>c</sup>         |                             |
| Reduced motivation                                     | Baseline               | 21/24 | 12.0 (6.0)                 | 5.0 (2.0)                  | < <b>0.001</b> <sup>a</sup> |
|                                                        | Post                   | 21/24 | 10.0 (8.0)                 | 4.0 (2.8)                  | < <b>0.001</b> <sup>a</sup> |
|                                                        | P-value with-in groups |       | 0.246 <sup>c</sup>         | 0.524 <sup>c</sup>         |                             |
| FIQ total (0-100)                                      | Baseline               | 21/21 | 64.1 (22.1)                | 3.5 (8.4)                  | < <b>0.001</b> <sup>a</sup> |
|                                                        | Post                   | 21/23 | 60.1 (29.2)                | 2.9 (14.5)                 | < <b>0.001</b> <sup>a</sup> |
|                                                        | P-value with-in groups |       | 0.079 <sup>c</sup>         | 0.184 <sup>c</sup>         |                             |
| PCS total (0-52)                                       | Baseline               | 21/16 | 20.0 (17.5)                | 2.5 (9.3)                  | < <b>0.001</b> <sup>a</sup> |
|                                                        | Post                   | 21/20 | 13.0 (11.5)                | 1.0 (9.0)                  | < <b>0.001</b> <sup>a</sup> |
|                                                        | P-value with-in groups |       | < <b>0.01</b> <sup>c</sup> | 0.449 <sup>c</sup>         |                             |
| HADS total (0-42)                                      | Baseline               | 21/24 | 17.0 (14.0)                | 3.5 (5.0)                  | < <b>0.001</b> <sup>a</sup> |
|                                                        | Post                   | 21/24 | 11.0 (17.5)                | 2.5 (7.0)                  | < <b>0.001</b> <sup>a</sup> |
|                                                        | P-value with-in groups |       | <b>0.047</b> <sup>c</sup>  | 0.569 <sup>c</sup>         |                             |
| PPT mean all sites (kPa)                               | Baseline               | 21/24 | 146.0 (116.0)              | 355.0 (168.5)              | < <b>0.001</b> <sup>a</sup> |
|                                                        | Post                   | 21/24 | 159.0 (105.0)              | 318.5 (152.0)              | < <b>0.001</b> <sup>a</sup> |
|                                                        | P-value with-in groups |       | 0.498 <sup>c</sup>         | 0.361 <sup>c</sup>         |                             |
| <b>Exercise related variables</b>                      |                        |       |                            |                            |                             |
| SixMWT (m)                                             | Baseline               | 21/23 | 588.0 (127.5)              | 644.0 (106.0)              | <b>0.044</b> <sup>b</sup>   |
|                                                        | Post                   | 21/23 | 594.0 (122.5)              | 677.0 (67.0)               | < <b>0.01</b> <sup>b</sup>  |
|                                                        | P-value with-in groups |       | 0.923 <sup>d</sup>         | < <b>0.01</b> <sup>d</sup> |                             |
| SteveStrong, Knee extension force (N) <sub>right</sub> | Baseline               | 21/23 | 330.0 (144.5)              | 399.0 (94.0)               | 0.083 <sup>b</sup>          |
|                                                        | Post                   | 21/23 | 410.0 (166.0)              | 408.0 (102.0)              | 0.713 <sup>b</sup>          |
|                                                        | P-value with-in groups |       | 0.065 <sup>d</sup>         | 0.857 <sup>d</sup>         |                             |
| SteveStrong, Knee extension force (N) <sub>left</sub>  | Baseline               | 21/23 | 312.0 (175.0)              | 367.0 (135.0)              | 0.552 <sup>b</sup>          |
|                                                        | Post                   | 21/23 | 357.0 (152.0)              | 385.0 (102.0)              | 0.593 <sup>b</sup>          |

|                                                      |                                |       |                                |                              |                               |  |
|------------------------------------------------------|--------------------------------|-------|--------------------------------|------------------------------|-------------------------------|--|
|                                                      |                                |       | <i>P</i> -value with-in groups | <b>0.044<sup>d</sup></b>     | <b>0.032<sup>d</sup></b>      |  |
| Gripit, Handgrip force mean (N) <sub>right</sub>     | Baseline                       | 21/23 | 153.0 (137.5)                  | 235.0 (44.0)                 | <b>&lt; 0.001<sup>b</sup></b> |  |
|                                                      | Post                           | 20/23 | 198.0 (116.8)                  | 249.0 (50.0)                 | <b>0.012<sup>b</sup></b>      |  |
|                                                      | <i>P</i> -value with-in groups |       | <b>&lt; 0.01<sup>d</sup></b>   | 0.245 <sup>d</sup>           |                               |  |
| Gripit, Handgrip force mean (N) <sub>left</sub>      | Baseline                       | 21/23 | 150.0 (120.0)                  | 209.0 (56.0)                 | <b>&lt; 0.001<sup>b</sup></b> |  |
|                                                      | Post                           | 20/23 | 169.5 (93.5)                   | 233.0 (71.0)                 | <b>&lt; 0.01<sup>b</sup></b>  |  |
|                                                      | <i>P</i> -value with-in groups |       | <b>0.024<sup>d</sup></b>       | <b>&lt; 0.01<sup>d</sup></b> |                               |  |
| Isobex, Elbow strength maximum (kg) <sub>right</sub> | Baseline                       | 21/16 | 11.9 (7.3)                     | 18.4 (7.8)                   | <b>&lt; 0.01<sup>b</sup></b>  |  |
|                                                      | Post                           | 21/16 | 14.7 (5.4)                     | 16.8 (7.4)                   | 0.103 <sup>b</sup>            |  |
|                                                      | <i>P</i> -value with-in groups |       | <b>0.014<sup>d</sup></b>       | 0.858 <sup>d</sup>           |                               |  |
| Isobex, Elbow strength maximum (kg) <sub>left</sub>  | Baseline                       | 21/16 | 11.5 (8.6)                     | 17.3 (6.6)                   | <b>&lt; 0.01<sup>b</sup></b>  |  |
|                                                      | Post                           | 21/16 | 14.5 (5.9)                     | 16.4 (5.6)                   | 0.081 <sup>b</sup>            |  |
|                                                      | <i>P</i> -value with-in groups |       | 0.113 <sup>d</sup>             | 0.514 <sup>d</sup>           |                               |  |

a = Mann-Whitney U test, b = Student t-test, c= Wilcoxon signed rank test, d= paired t-test.

FM = Fibromyalgia, CON = controls, BMI = Body mass index, VAS = Visual Analogue Scale, PPT = Pressure pain thresholds, FIQ = Fibromyalgia Impact Questionnaire, CPAQ = Chronic Pain Acceptance Questionnaire, PCS = Pain Catastrophizing Scale, HADS = Hospital Anxiety and Depression Scale, MFI = Multidimensional Fatigue Inventory. SixMWT = Six minute walk test. Bold marking indicates a significant *P*-value.

**SDC Table 2. Identified plasma proteins.**

| Full protein name                                                                                          | Accession number         | Gene name<br>(used in<br>STRING<br>networks) | Protein name<br>in MVDA<br>models |
|------------------------------------------------------------------------------------------------------------|--------------------------|----------------------------------------------|-----------------------------------|
| 14-3-3 protein epsilon;Isoform SV of 14-3-3 protein epsilon                                                | P62258;P62258-2          | YWHAE                                        | 1433E                             |
| 14-3-3 protein zeta/delta                                                                                  | P63104                   | YWHAZ                                        | 1433Z                             |
| 40S ribosomal protein S3a                                                                                  | P61247                   | RPS3A                                        | RS3A                              |
| 60S ribosomal protein L37a                                                                                 | P61513                   | RPL37A                                       | RL37A                             |
| 72 kDa type IV collagenase;Isoform 2 of 72 kDa type IV collagenase;Isoform 3 of 72 kDa type IV collagenase | P08253;P08253-2;P08253-3 | MMP2                                         | MMP2                              |
| A disintegrin and metalloproteinase with thrombospondin motifs 13                                          | Q76LX8                   | ADAMTS13                                     | ATS13                             |
| Actin, aortic smooth muscle;Actin, gamma-enteric smooth muscle                                             | P62736;P63267            | ACTA2;ACTG2                                  | ACTA;ACTH                         |
| Actin, cytoplasmic 1;Actin, cytoplasmic 2                                                                  | P60709;P63261            | ACTB;ACTG1                                   | ACTB;ACTG                         |
| ADAM DEC1;Isoform 2 of ADAM DEC1                                                                           | O15204;O15204-2          | ADAMDEC1                                     | ADEC1                             |
| Adenosine deaminase 2;Isoform 2 of Adenosine deaminase 2                                                   | Q9NZK5;Q9NZK5-2          | ADA2                                         | ADA2                              |
| Adenylyl cyclase-associated protein 1;Isoform 2 of Adenylyl cyclase-associated protein 1                   | Q01518;Q01518-2          | CAP1                                         | CAP1                              |
| Adhesion G protein-coupled receptor F5;Isoform 2 of Adhesion G protein-coupled receptor F5                 | Q8IZF2;Q8IZF2-2          | ADGRF5                                       | AGRF5                             |

|                                                                                                                                                                                                    |                                   |                 |           |
|----------------------------------------------------------------------------------------------------------------------------------------------------------------------------------------------------|-----------------------------------|-----------------|-----------|
| Adhesion G-protein coupled receptor G6;Isoform 2 of Adhesion G-protein coupled receptor G6;Isoform 3 of Adhesion G-protein coupled receptor G6;Isoform 4 of Adhesion G-protein coupled receptor G6 | Q86SQ4;Q86SQ4-2;Q86SQ4-3;Q86SQ4-4 | ADGRG6          | AGRG6     |
| Adipocyte plasma membrane-associated protein                                                                                                                                                       | Q9HDC9                            | APMAP           | APMAP     |
| Adiponectin                                                                                                                                                                                        | Q15848                            | ADIPOQ          | ADIPO     |
| ADP/ATP translocase 1;ADP/ATP translocase 3                                                                                                                                                        | P12235;P12236                     | SLC25A4;SLC25A6 | ADT1;ADT3 |
| ADP-ribosyl cyclase/cyclic ADP-ribose hydrolase 2;Isoform 2 of ADP-ribosyl cyclase/cyclic ADP-ribose hydrolase 2                                                                                   | Q10588;Q10588-2                   | BST1            | BST1      |
| Afadin- and alpha-actinin-binding protein;Isoform 2 of Afadin- and alpha-actinin-binding protein;Isoform 3 of Afadin- and alpha-actinin-binding protein                                            | Q9Y2D8;Q9Y2D8-2;Q9Y2D8-3          | SSX2IP          | ADIP      |
| Afamin                                                                                                                                                                                             | P43652                            | AFM             | AFAM      |
| Alpha-1-acid glycoprotein 1                                                                                                                                                                        | P02763                            | ORM1            | A1AG1     |
| Alpha-1-acid glycoprotein 2                                                                                                                                                                        | P19652                            | ORM2            | A1AG2     |
| Alpha-1-antichymotrypsin                                                                                                                                                                           | P01011                            | SERPINA3        | AACT      |
| Alpha-1-antitrypsin                                                                                                                                                                                | P01009                            | SERPINA1        | A1AT      |
| Alpha-1B-glycoprotein                                                                                                                                                                              | P04217                            | A1BG            | A1BG      |
| Alpha-2-antiplasmin                                                                                                                                                                                | P08697                            | SERPINF2        | A2AP      |
| Alpha-2-HS-glycoprotein                                                                                                                                                                            | P02765                            | AHSG            | FETUA     |
| Alpha-2-macroglobulin                                                                                                                                                                              | P01023                            | A2M             | A2MG      |

|                                                                                              |                          |          |       |
|----------------------------------------------------------------------------------------------|--------------------------|----------|-------|
| Alpha-actinin-1;Isoform 2 of Alpha-actinin-1;Isoform 3 of Alpha-actinin-1                    | P12814;P12814-2;P12814-3 | ACTN1    | ACTN1 |
| Alpha-amylase 1                                                                              | P04745                   | AMY1A    | AMY1  |
| Alpha-mannosidase 2                                                                          | Q16706                   | MAN2A1   | MA2A1 |
| Alpha-N-acetylglucosaminidase                                                                | P54802                   | NAGLU    | ANAG  |
| Aminopeptidase N                                                                             | P15144                   | ANPEP    | AMPN  |
| Angiogenin                                                                                   | P03950                   | ANG      | ANGI  |
| Angiopoietin-related protein 3                                                               | Q9Y5C1                   | ANGPTL3  | ANGL3 |
| Angiopoietin-related protein 6                                                               | Q8NI99                   | ANGPTL6  | ANGL6 |
| Angiotensinogen                                                                              | P01019                   | AGT      | ANGT  |
| Annexin A1                                                                                   | P04083                   | ANXA1    | ANXA1 |
| Antileukoproteinase                                                                          | P03973                   | SLPI     | SLPI  |
| Antithrombin-III                                                                             | P01008                   | SERPINC1 | ANT3  |
| Apolipoprotein A-I                                                                           | P02647                   | APOA1    | APOA1 |
| Apolipoprotein A-II                                                                          | P02652                   | APOA2    | APOA2 |
| Apolipoprotein A-IV                                                                          | P06727                   | APOA4    | APOA4 |
| Apolipoprotein A-V                                                                           | Q6Q788                   | APOA5    | APOA5 |
| Apolipoprotein B-100                                                                         | P04114                   | APOB     | APOB  |
| Apolipoprotein C-I                                                                           | P02654                   | APOC1    | APOC1 |
| Apolipoprotein C-II                                                                          | P02655                   | APOC2    | APOC2 |
| Apolipoprotein C-III                                                                         | P02656                   | APOC3    | APOC3 |
| Apolipoprotein C-IV                                                                          | P55056                   | APOC4    | APOC4 |
| Apolipoprotein D                                                                             | P05090                   | APOD     | APOD  |
| Apolipoprotein E                                                                             | P02649                   | APOE     | APOE  |
| Apolipoprotein F                                                                             | Q13790                   | APOF     | APOF  |
| Apolipoprotein L1;Isoform 2 of Apolipoprotein L1                                             | O14791;O14791-2          | APOL1    | APOL1 |
| Apolipoprotein M                                                                             | O95445                   | APOM     | APOM  |
| Apolipoprotein(a)                                                                            | P08519                   | LPA      | APOA  |
| Aspartate aminotransferase, cytoplasmic;Isoform 2 of Aspartate aminotransferase, cytoplasmic | P17174;P17174-2          | GOT1     | AATC  |
| ATP synthase subunit beta, mitochondrial                                                     | P06576                   | ATP5F1B  | ATPB  |
| ATP-dependent RNA helicase DDX55                                                             | Q8NHQ9                   | DDX55    | DDX55 |



|                                                                                        |                                   |        |       |
|----------------------------------------------------------------------------------------|-----------------------------------|--------|-------|
| Band 3 anion transport protein;Isoform 2 of Band 3 anion transport protein             | P02730;P02730-2                   | SLC4A1 | B3AT  |
| Basement membrane-specific heparan sulfate proteoglycan core protein                   | P98160                            | HSPG2  | PGBM  |
| Beta-2-glycoprotein 1                                                                  | P02749                            | APOH   | APOH  |
| Beta-2-microglobulin                                                                   | P61769                            | B2M    | B2MG  |
| Beta-Ala-His dipeptidase                                                               | Q96KN2                            | CNDP1  | CNDP1 |
| Beta-parvin;Isoform 2 of Beta-parvin;Isoform 3 of Beta-parvin                          | Q9HBI1;Q9HBI1-2;Q9HBI1-3          | PARVB  | PARVB |
| Biotinidase;Isoform 2 of Biotinidase;Isoform 3 of Biotinidase;Isoform 4 of Biotinidase | P43251;P43251-2;P43251-3;P43251-4 | BTD    | BTD   |
| Bisphosphoglycerate mutase                                                             | P07738                            | BPGM   | PMGE  |
| Bone marrow proteoglycan                                                               | P13727                            | PRG2   | PRG2  |
| BPI fold-containing family B member 1                                                  | Q8TDL5                            | BPIFB1 | BPIB1 |
| Brain acid soluble protein 1                                                           | P80723                            | BASP1  | BASP1 |
| C4b-binding protein alpha chain                                                        | P04003                            | C4BPA  | C4BPA |
| C4b-binding protein beta chain;Isoform 2 of C4b-binding protein beta chain             | P20851;P20851-2                   | C4BPB  | C4BPB |
| Cadherin-1                                                                             | P12830                            | CDH1   | CADH1 |
| Cadherin-13;Isoform 4 of Cadherin-13                                                   | P55290;P55290-4                   | CDH13  | CAD13 |
| Cadherin-5                                                                             | P33151                            | CDH5   | CADH5 |
| Calcium uptake protein 2, mitochondrial                                                | Q8IYU8                            | MICU2  | MICU2 |
| Calmodulin-like protein 5                                                              | Q9NZT1                            | CALML5 | CALL5 |
| Calnexin;Isoform 2 of Calnexin;Isoform 3 of Calnexin                                   | P27824;P27824-2;P27824-3          | CANX   | CALX  |
| Calreticulin                                                                           | P27797                            | CALR   | CALR  |
| Carbonic anhydrase 1                                                                   | P00915                            | CA1    | CAH1  |
| Carbonic anhydrase 2                                                                   | P00918                            | CA2    | CAH2  |

|                                                                                                            |                          |        |       |
|------------------------------------------------------------------------------------------------------------|--------------------------|--------|-------|
| Carboxypeptidase B2                                                                                        | Q96IY4                   | CPB2   | CBPB2 |
| Carboxypeptidase N catalytic chain                                                                         | P15169                   | CPN1   | CBPN  |
| Carboxypeptidase N subunit 2                                                                               | P22792                   | CPN2   | CPN2  |
| Carboxypeptidase Q                                                                                         | Q9Y646                   | CPQ    | CBPQ  |
| Cartilage acidic protein 1;Isoform 2 of Cartilage acidic protein 1;Isoform 3 of Cartilage acidic protein 1 | Q9NQ79;Q9NQ79-2;Q9NQ79-3 | CRTAC1 | CRAC1 |
| Cartilage oligomeric matrix protein                                                                        | P49747                   | COMP   | COMP  |
| Catalase                                                                                                   | P04040                   | CAT    | CATA  |
| Cathelicidin antimicrobial peptide                                                                         | P49913                   | CAMP   | CAMP  |
| Cathepsin B                                                                                                | P07858                   | CTSB   | CATB  |
| Cathepsin D                                                                                                | P07339                   | CTSD   | CATD  |
| Cathepsin S;Isoform 2 of Cathepsin S                                                                       | P25774;P25774-2          | CTSS   | CATS  |
| Caveolae-associated protein 2                                                                              | O95810                   | CAVIN2 | CAVN2 |
| CD109 antigen;Isoform 2 of CD109 antigen;Isoform 4 of CD109 antigen                                        | Q6YHK3;Q6YHK3-2;Q6YHK3-4 | CD109  | CD109 |

|                                                                                                                                                                                                                                                                                                                                                                                                                                                       |                                                                                                                                                                 |       |       |
|-------------------------------------------------------------------------------------------------------------------------------------------------------------------------------------------------------------------------------------------------------------------------------------------------------------------------------------------------------------------------------------------------------------------------------------------------------|-----------------------------------------------------------------------------------------------------------------------------------------------------------------|-------|-------|
| CD44 antigen;Isoform 10 of CD44 antigen;Isoform 11 of CD44 antigen;Isoform 12 of CD44 antigen;Isoform 13 of CD44 antigen;Isoform 14 of CD44 antigen;Isoform 15 of CD44 antigen;Isoform 16 of CD44 antigen;Isoform 17 of CD44 antigen;Isoform 18 of CD44 antigen;Isoform 3 of CD44 antigen;Isoform 4 of CD44 antigen;Isoform 5 of CD44 antigen;Isoform 6 of CD44 antigen;Isoform 7 of CD44 antigen;Isoform 8 of CD44 antigen;Isoform 9 of CD44 antigen | P16070;P16070-10;P16070-11;P16070-12;P16070-13;P16070-14;P16070-15;P16070-16;P16070-17;P16070-18;P16070-3;P16070-4;P16070-5;P16070-6;P16070-7;P16070-8;P16070-9 | CD44  | CD44  |
| CD5 antigen-like                                                                                                                                                                                                                                                                                                                                                                                                                                      | O43866                                                                                                                                                          | CD5L  | CD5L  |
| CD9 antigen                                                                                                                                                                                                                                                                                                                                                                                                                                           | P21926                                                                                                                                                          | CD9   | CD9   |
| Cell surface glycoprotein MUC18                                                                                                                                                                                                                                                                                                                                                                                                                       | P43121                                                                                                                                                          | MCAM  | MUC18 |
| Ceramide transfer protein;Isoform 2 of Ceramide transfer protein;Isoform 3 of Ceramide transfer protein                                                                                                                                                                                                                                                                                                                                               | Q9Y5P4;Q9Y5P4-2;Q9Y5P4-3                                                                                                                                        | CERT  | CERT  |
| Ceruloplasmin                                                                                                                                                                                                                                                                                                                                                                                                                                         | P00450                                                                                                                                                          | CP    | CERU  |
| Chloride intracellular channel protein 1                                                                                                                                                                                                                                                                                                                                                                                                              | O00299                                                                                                                                                          | CLIC1 | CLIC1 |
| Cholesteryl ester transfer protein                                                                                                                                                                                                                                                                                                                                                                                                                    | P11597                                                                                                                                                          | CETP  | CETP  |
| Cholinesterase                                                                                                                                                                                                                                                                                                                                                                                                                                        | P06276                                                                                                                                                          | BCHE  | CHLE  |
| Chromogranin-A                                                                                                                                                                                                                                                                                                                                                                                                                                        | P10645                                                                                                                                                          | CHGA  | CMGA  |
| Clathrin heavy chain 1;Isoform 2 of Clathrin heavy chain 1                                                                                                                                                                                                                                                                                                                                                                                            | Q00610;Q00610-2                                                                                                                                                 | CLTC  | CLH1  |
| Coagulation factor IX                                                                                                                                                                                                                                                                                                                                                                                                                                 | P00740                                                                                                                                                          | F9    | FA9   |
| Coagulation factor V                                                                                                                                                                                                                                                                                                                                                                                                                                  | P12259                                                                                                                                                          | F5    | FA5   |

|                                                                                                                                                                                            |                                            |         |       |
|--------------------------------------------------------------------------------------------------------------------------------------------------------------------------------------------|--------------------------------------------|---------|-------|
| Coagulation factor VII;Isoform B of Coagulation factor VII                                                                                                                                 | P08709;P08709-2                            | F7      | FA7   |
| Coagulation factor X                                                                                                                                                                       | P00742                                     | F10     | FA10  |
| Coagulation factor XI                                                                                                                                                                      | P03951                                     | F11     | FA11  |
| Coagulation factor XII                                                                                                                                                                     | P00748                                     | F12     | FA12  |
| Coagulation factor XIII A chain                                                                                                                                                            | P00488                                     | F13A1   | F13A  |
| Coagulation factor XIII B chain                                                                                                                                                            | P05160                                     | F13B    | F13B  |
| Cofilin-1                                                                                                                                                                                  | P23528                                     | CFL1    | COF1  |
| Collagen alpha-1(I) chain                                                                                                                                                                  | P02452                                     | COL1A1  | CO1A1 |
| Collagen alpha-1(III) chain                                                                                                                                                                | P02461                                     | COL3A1  | CO3A1 |
| Collagen alpha-1(VI) chain                                                                                                                                                                 | P12109                                     | COL6A1  | CO6A1 |
| Collagen alpha-1(XVIII) chain;Isoform 2 of Collagen alpha-1(XVIII) chain;Isoform 3 of Collagen alpha-1(XVIII) chain                                                                        | P39060;P39060-1;P39060-2                   | COL18A1 | CO1A1 |
| Collagen alpha-2(I) chain                                                                                                                                                                  | P08123                                     | COL1A2  | CO1A2 |
| Collagen alpha-3(VI) chain;Isoform 2 of Collagen alpha-3(VI) chain;Isoform 3 of Collagen alpha-3(VI) chain;Isoform 4 of Collagen alpha-3(VI) chain;Isoform 5 of Collagen alpha-3(VI) chain | P12111;P12111-2;P12111-3;P12111-4;P12111-5 | COL6A3  | CO6A3 |
| Collectin-10                                                                                                                                                                               | Q9Y6Z7                                     | COLEC10 | COL10 |

|                                                                                                                                                                                                                                                         |                                                                                          |         |       |
|---------------------------------------------------------------------------------------------------------------------------------------------------------------------------------------------------------------------------------------------------------|------------------------------------------------------------------------------------------|---------|-------|
| Collectin-11;Isoform 10 of Collectin-11;Isoform 2 of Collectin-11;Isoform 3 of Collectin-11;Isoform 4 of Collectin-11;Isoform 5 of Collectin-11;Isoform 6 of Collectin-11;Isoform 7 of Collectin-11;Isoform 8 of Collectin-11;Isoform 9 of Collectin-11 | Q9BWP8;Q9BWP8-10;Q9BWP8-2;Q9BWP8-3;Q9BWP8-4;Q9BWP8-5;Q9BWP8-6;Q9BWP8-7;Q9BWP8-8;Q9BWP8-9 | COLEC11 | COL11 |
|---------------------------------------------------------------------------------------------------------------------------------------------------------------------------------------------------------------------------------------------------------|------------------------------------------------------------------------------------------|---------|-------|

|                                       |        |      |      |
|---------------------------------------|--------|------|------|
| Complement C1q subcomponent subunit A | P02745 | C1QA | C1QA |
| Complement C1q subcomponent subunit B | P02746 | C1QB | C1QB |
| Complement C1q subcomponent subunit C | P02747 | C1QC | C1QC |

|                                                                                                                                                                                                |                          |         |       |
|------------------------------------------------------------------------------------------------------------------------------------------------------------------------------------------------|--------------------------|---------|-------|
| Complement C1q tumor necrosis factor-related protein 3;Isoform 2 of Complement C1q tumor necrosis factor-related protein 3;Isoform 3 of Complement C1q tumor necrosis factor-related protein 3 | Q9BXJ4;Q9BXJ4-2;Q9BXJ4-3 | C1QTNF3 | C1QT3 |
|------------------------------------------------------------------------------------------------------------------------------------------------------------------------------------------------|--------------------------|---------|-------|

|                                          |        |      |      |
|------------------------------------------|--------|------|------|
| Complement C1r subcomponent              | P00736 | C1R  | C1R  |
| Complement C1r subcomponent-like protein | Q9NZP8 | C1RL | C1RL |
| Complement C1s subcomponent              | P09871 | C1S  | C1S  |
| Complement C2                            | P06681 | C2   | CO2  |
| Complement C3                            | P01024 | C3   | CO3  |
| Complement C4-A                          | P0C0L4 | C4A  | CO4A |
| Complement C4-B                          | P0C0L5 | C4B  | CO4B |
| Complement C5                            | P01031 | C5   | CO5  |
| Complement component C6                  | P13671 | C6   | CO6  |

|                                                                                                         |                                                     |          |       |
|---------------------------------------------------------------------------------------------------------|-----------------------------------------------------|----------|-------|
| Complement component C7                                                                                 | P10643                                              | C7       | CO7   |
| Complement component C8 alpha chain                                                                     | P07357                                              | C8A      | CO8A  |
| Complement component C8 beta chain                                                                      | P07358                                              | C8B      | CO8B  |
| Complement component C8 gamma chain                                                                     | P07360                                              | C8G      | CO8G  |
| Complement component C9                                                                                 | P02748                                              | C9       | CO9   |
| Complement factor B                                                                                     | P00751                                              | CFB      | CFAB  |
| Complement factor D                                                                                     | P00746                                              | CFD      | CFAD  |
| Complement factor H                                                                                     | P08603                                              | CFH      | CFAH  |
| Complement factor H-related protein 1                                                                   | Q03591                                              | CFHR1    | FHR1  |
| Complement factor H-related protein 2                                                                   | P36980                                              | CFHR2    | FHR2  |
| Complement factor H-related protein 3; Isoform 2 of Complement factor H-related protein 3               | Q02985;Q02985-2                                     | CFHR3    | FHR3  |
| Complement factor H-related protein 4; Isoform 2 of Complement factor H-related protein 4               | Q92496;Q92496-2                                     | CFHR4    | FHR4  |
| Complement factor H-related protein 5                                                                   | Q9BXR6                                              | CFHR5    | FHR5  |
| Complement factor I                                                                                     | P05156                                              | CFI      | CFAI  |
| Conserved oligomeric Golgi complex subunit 4; Isoform 3 of Conserved oligomeric Golgi complex subunit 4 | Q9H9E3;Q9H9E3-3                                     | COG4     | COG4  |
| Contactin-1; Isoform 2 of Contactin-1                                                                   | Q12860;Q12860-2                                     | CNTN1    | CNTN1 |
| Corticosteroid-binding globulin                                                                         | P08185                                              | SERPINA6 | CBG   |
| C-reactive protein                                                                                      | P02741                                              | CRP      | CRP   |
| Creatine kinase M-type                                                                                  | P06732                                              | CKM      | KCRM  |
| Cystatin-C                                                                                              | P01034;P01034 A25S;P01034 B allele A25T;P01034 L94Q | CST3     | CYTC  |

|                                                                                                                                                                                                                                                                                    |                                   |        |       |
|------------------------------------------------------------------------------------------------------------------------------------------------------------------------------------------------------------------------------------------------------------------------------------|-----------------------------------|--------|-------|
| Cystatin-M                                                                                                                                                                                                                                                                         | Q15828                            | CST6   | CYTM  |
| Cysteine-rich secretory protein 3;Isoform 2 of Cysteine-rich secretory protein 3;Isoform 3 of Cysteine-rich secretory protein 3                                                                                                                                                    | P54108;P54108-2;P54108-3          | CRISP3 | CRIS3 |
| Dermcidin;Isoform 2 of Dermcidin                                                                                                                                                                                                                                                   | P81605;P81605-2                   | DCD    | DCD   |
| Desmocollin-1;Isoform 1B of Desmocollin-1                                                                                                                                                                                                                                          | Q08554;Q08554-2                   | DSC1   | DSC1  |
| Desmoglein-1                                                                                                                                                                                                                                                                       | Q02413                            | DSG1   | DSG1  |
| Desmoglein-2                                                                                                                                                                                                                                                                       | Q14126                            | DSG2   | DSG2  |
| Desmoplakin;Isoform DPII of Desmoplakin;Isoform DSPIa of Desmoplakin                                                                                                                                                                                                               | P15924;P15924-2;P15924-3          | DSP    | DESP  |
| Di-N-acetylchitobiase                                                                                                                                                                                                                                                              | Q01459                            | CTBS   | DIAC  |
| Dipeptidase 2;Isoform 2 of Dipeptidase 2                                                                                                                                                                                                                                           | Q9H4A9;Q9H4A9-2                   | DPEP2  | DPEP2 |
| Dopamine beta-hydroxylase                                                                                                                                                                                                                                                          | P09172                            | DBH    | DOPO  |
| Dystroglycan                                                                                                                                                                                                                                                                       | Q14118                            | DAG1   | DAG1  |
| Ectonucleotide pyrophosphatase/phosphodiesterase family member 2;Isoform 2 of Ectonucleotide pyrophosphatase/phosphodiesterase family member 2;Isoform 3 of Ectonucleotide pyrophosphatase/phosphodiesterase family member 2                                                       | Q13822;Q13822-2;Q13822-3          | ENPP2  | ENPP2 |
| EGF-containing fibulin-like extracellular matrix protein 1;Isoform 2 of EGF-containing fibulin-like extracellular matrix protein 1;Isoform 3 of EGF-containing fibulin-like extracellular matrix protein 1;Isoform 4 of EGF-containing fibulin-like extracellular matrix protein 1 | Q12805;Q12805-2;Q12805-3;Q12805-4 | EFEMP1 | FBLN3 |

|                                                                                                                                                                                                           |                               |                               |                         |
|-----------------------------------------------------------------------------------------------------------------------------------------------------------------------------------------------------------|-------------------------------|-------------------------------|-------------------------|
| Elongation factor 1-alpha 1;Isoform 2 of Elongation factor 1-alpha 1;Elongation factor 1-alpha 2;Putative elongation factor 1-alpha-like 3                                                                | P68104;P68104-2;Q05639;Q5VTE0 | EEF1A1;EEF1A1;EEF1A2;EEF1A1P5 | EF1A1;EF1A1;EF1A2;EF1A3 |
| Endoplasmic reticulum chaperone BiP                                                                                                                                                                       | P11021                        | HSPA5                         | BIP                     |
| Endoplasmin                                                                                                                                                                                               | P14625                        | HSP90B1                       | ENPL                    |
| Endothelial protein C receptor                                                                                                                                                                            | Q9UNN8                        | PROCR                         | EPCR                    |
| Ephrin type-A receptor 1                                                                                                                                                                                  | P21709                        | EPHA1                         | EPHA1                   |
| Eukaryotic translation initiation factor 5A-1;Isoform 2 of Eukaryotic translation initiation factor 5A-1;Eukaryotic translation initiation factor 5A-1-like;Eukaryotic translation initiation factor 5A-2 | P63241;P63241-2;Q6IS14;Q9GZV4 | EIF5A;EIF5A;EIF5AL1;EIF5A2    | IF5A1;IF5A1;IF5AL;IF5A2 |
| Extracellular matrix protein 1                                                                                                                                                                            | Q16610                        | ECM1                          | ECM1                    |
| Extracellular superoxide dismutase [Cu-Zn]                                                                                                                                                                | P08294                        | SOD3                          | SODE                    |
| Far upstream element-binding protein 2;Far upstream element-binding protein 1;Isoform 2 of Far upstream element-binding protein 1                                                                         | Q92945;Q96AE4;Q96AE4-2        | KHSRP;FUBP1;FUBP1             | FUBP2;FUBP1;FUBP1       |
| Fatty acid-binding protein 5                                                                                                                                                                              | Q01469                        | FABP5                         | FABP5                   |
| Fermitin family homolog 3;Isoform 2 of Fermitin family homolog 3                                                                                                                                          | Q86UX7;Q86UX7-2               | FERMT3                        | URP2                    |
| Fetuin-B                                                                                                                                                                                                  | Q9UGM5                        | FETUB                         | FETUB                   |
| Fibrinogen alpha chain                                                                                                                                                                                    | P02671                        | FGA                           | FIBA                    |
| Fibrinogen beta chain                                                                                                                                                                                     | P02675                        | FGB                           | FIBB                    |
| Fibrinogen gamma chain                                                                                                                                                                                    | P02679                        | FGG                           | FIBG                    |



|                                                                                                |                 |          |       |
|------------------------------------------------------------------------------------------------|-----------------|----------|-------|
| Fibrinogen-like protein 1                                                                      | Q08830          | FGL1     | FGL1  |
| Fibulin-1                                                                                      | P23142          | FBLN1    | FBLN1 |
| Fibulin-5                                                                                      | Q9UBX5          | FBLN5    | FBLN5 |
| Ficolin-2                                                                                      | Q15485          | FCN2     | FCN2  |
| Ficolin-3                                                                                      | O75636          | FCN3     | FCN3  |
| Filaggrin                                                                                      | P20930          | FLG      | FILA  |
| Filaggrin-2                                                                                    | Q5D862          | FLG2     | FILA2 |
| Filamin-A;Isoform 2 of Filamin-A                                                               | P21333;P21333-2 | FLNA     | FLNA  |
| Flavin reductase (NADPH)                                                                       | P30043          | BLVRB    | BLVRB |
| Fructose-bisphosphate aldolase A                                                               | P04075          | ALDOA    | ALDOA |
| Fructose-bisphosphate aldolase B                                                               | P05062          | ALDOB    | ALDOB |
| Galectin-3-binding protein                                                                     | Q08380          | LGALS3BP | LG3BP |
| Gelsolin                                                                                       | P06396          | GSN      | GELS  |
| Glucosidase 2 subunit beta;Isoform 2 of Glucosidase 2 subunit beta                             | P14314;P14314-2 | PRKCSH   | GLU2B |
| Glutathione peroxidase 3                                                                       | P22352          | GPX3     | GPX3  |
| Glyceraldehyde-3-phosphate dehydrogenase;Isoform 2 of Glyceraldehyde-3-phosphate dehydrogenase | P04406;P04406-2 | GAPDH    | G3P   |
| Haptoglobin                                                                                    | P00738          | HP       | HPT   |
| Haptoglobin-related protein                                                                    | P00739          | HPR      | HPTR  |
| Heat shock 70 kDa protein 1-like                                                               | P34931          | HSPA1L   | HS71L |
| Heat shock cognate 71 kDa protein                                                              | P11142          | HSPA8    | HSP7C |
| Hemoglobin subunit alpha                                                                       | P69905          | HBA1     | HBA   |
| Hemoglobin subunit beta                                                                        | P68871          | HBB      | HBB   |
| Hemoglobin subunit delta                                                                       | P02042          | HBD      | HBD   |
| Hemoglobin subunit epsilon                                                                     | P02100          | HBE1     | HBE   |

|                                                                                                                                                                                                                                                                                                                                                                                    |                                                                                                                                       |                                                                                                                                      |                                                                                                   |
|------------------------------------------------------------------------------------------------------------------------------------------------------------------------------------------------------------------------------------------------------------------------------------------------------------------------------------------------------------------------------------|---------------------------------------------------------------------------------------------------------------------------------------|--------------------------------------------------------------------------------------------------------------------------------------|---------------------------------------------------------------------------------------------------|
| Hemoglobin subunit gamma-1;Hemoglobin subunit gamma-2                                                                                                                                                                                                                                                                                                                              | P69891;P69892                                                                                                                         | HBG1;HBG2                                                                                                                            | HBG1;HBG2                                                                                         |
| Hemopexin                                                                                                                                                                                                                                                                                                                                                                          | P02790                                                                                                                                | HPX                                                                                                                                  | HEMO                                                                                              |
| Heparin cofactor 2                                                                                                                                                                                                                                                                                                                                                                 | P05546                                                                                                                                | SERPIND1                                                                                                                             | HEP2                                                                                              |
| Hepatocyte growth factor activator                                                                                                                                                                                                                                                                                                                                                 | Q04756                                                                                                                                | HGFAC                                                                                                                                | HGFA                                                                                              |
| Hepatocyte growth factor-like protein                                                                                                                                                                                                                                                                                                                                              | P26927                                                                                                                                | MST1                                                                                                                                 | HGFL                                                                                              |
| Hepatocyte nuclear factor 3-alpha;Isoform 2 of Hepatocyte nuclear factor 3-alpha                                                                                                                                                                                                                                                                                                   | P55317;P55317-2                                                                                                                       | FOXA1                                                                                                                                | FOXA1                                                                                             |
| Histidine-rich glycoprotein                                                                                                                                                                                                                                                                                                                                                        | P04196                                                                                                                                | HRG                                                                                                                                  | HRG                                                                                               |
| Histone H2A type 1-B/E;Histone H2A.Z;Histone H2A type 1;Histone H2AX;Histone H2A type 1-D;Histone H2A type 2-C;Histone H2A type 2-A;Histone H2A.V;Isoform 2 of Histone H2A.V;Isoform 3 of Histone H2A.V;Isoform 4 of Histone H2A.V;Histone H2A type 3;Histone H2A type 1-C;Histone H2A type 1-H;Histone H2A type 1-A;Histone H2A type 1-J;Histone H2A.J;Isoform 2 of Histone H2A.J | P04908;P0C0S5;P0C0S8;P16104;P20671;Q16777;Q6F113;Q71UI9;Q71UI9-2;Q71UI9-3;Q71UI9-4;Q7L7L0;Q93077;Q96KK5;Q96QV6;Q99878;Q9BTM1;Q9BTM1-2 | HIST1H2AB;H2AC4;H2AZ1;H2AC11;H2AFX;H2AC7;HIST2H2AC;HIST2H2AA3;H2AFV;H2AFV;H2AFV;HIS T3H2A;HIST1H2AC;HIST1H2AH;HIST1H2AA;H2AC14;H2AFJ | H2A1B;H2AZ;H2A1;H2AX;H2A1D;H2A2C;H2A2A;H2AV;H2AV;H2AV;H2AV;H2A3;H2A1C;H2A1H;H2A1A;H2A1J;H2AJ;H2AJ |
| Histone H2B type 1-K;Histone H2B type 1-J;Histone H2B type 1-O;Histone H2B type 1-B;Histone H2B type F-S;Histone H2B type 1-D;Histone H2B type 1-C/E/F/G/I;Histone H2B type 2-E;Histone H2B type 2-F;Isoform 2 of Histone H2B type 2-F;Histone H2B type 3-B;Histone H2B type 1-H;Histone H2B type 1-N;Histone H2B type 1-M;Histone H2B type 1-L                                    | O60814;P06899;P23527;P33778;P57053;P58876;P62807;Q16778;Q5QNW6;Q5QNW6-2;Q8N257;Q93079;Q99877;Q99879;Q99880                            | HIST1H2BK;H2BC12;H2BC11;HIST1H2BO;HIST1H2BB;H2BFS;HIST1H2BD;H2BC4;HIST2H2BE;HIST2H2BF;HIST3H2BB;HIST1H2BH;H2BC15;H2BC14;H2BC13       | H2B1K;H2B1J;H2B1O;H2B1B;H2BFS;H2B1D;H2B1C;H2B2E;H2B2F;H2B2F;H2B3B;H2B1H;H2B1N;H2B1M;H2B1L         |

|                                                                                                                          |                 |                   |       |
|--------------------------------------------------------------------------------------------------------------------------|-----------------|-------------------|-------|
| Histone H4                                                                                                               | P62805          | HIST1H4E;<br>H4C1 | H4    |
| HLA class I histocompatibility antigen, A alpha chain;Isoform 2 of HLA class I histocompatibility antigen, A alpha chain | P04439;P04439-2 | HLA-A             | HLAA  |
| HLA class I histocompatibility antigen, B alpha chain                                                                    | P01889          | HLA-B             | HLAB  |
| Homeobox protein Nkx-2.5                                                                                                 | P52952          | NKX2-5            | NKX25 |
| Hornerin                                                                                                                 | Q86YZ3          | HRNR              | HORN  |
| Hyaluronan-binding protein 2;Isoform 2 of Hyaluronan-binding protein 2                                                   | Q14520;Q14520-2 | HABP2             | HABP2 |
| Hypoxia up-regulated protein 1                                                                                           | Q9Y4L1          | HYOU1             | HYOU1 |
| ICOS ligand;Isoform 2 of ICOS ligand                                                                                     | O75144;O75144-2 | ICOSLG            | ICOSL |
| IgGFc-binding protein                                                                                                    | Q9Y6R7          | FCGBP             | FCGBP |
| Immunoglobulin alpha-2 heavy chain                                                                                       | P0DOX2          |                   | IGA2  |
| Immunoglobulin delta heavy chain                                                                                         | P0DOX3          |                   | IGD   |
| Immunoglobulin epsilon heavy chain                                                                                       | P0DOX4          |                   | IGE   |
| Immunoglobulin gamma-1 heavy chain                                                                                       | P0DOX5          |                   | IGG1  |
| Immunoglobulin heavy constant alpha 1                                                                                    | P01876          | IGHA1             | IGHA1 |
| Immunoglobulin heavy constant alpha 2                                                                                    | P01877          | IGHA2             | IGHA2 |
| Immunoglobulin heavy constant delta;Isoform 2 of Immunoglobulin heavy constant delta                                     | P01880;P01880-2 | IGHD              | IGHD  |
| Immunoglobulin heavy constant gamma 2                                                                                    | P01859          | IGHG2             | IGHG2 |
| Immunoglobulin heavy constant gamma 3                                                                                    | P01860          | IGHG3             | IGHG3 |
| Immunoglobulin heavy constant gamma 4                                                                                    | P01861          | IGHG4             | IGHG4 |
| Immunoglobulin heavy constant mu                                                                                         | P01871          | IGHM              | IGHM  |
| Immunoglobulin heavy variable 1-18                                                                                       | A0A0C4DH31      | IGHV1-18          | HV118 |
| Immunoglobulin heavy variable 1-2                                                                                        | P23083          | IGHV1-2           | HV102 |
| Immunoglobulin heavy variable 1-24                                                                                       | A0A0C4DH33      | IGHV1-24          | HV124 |

|                                                                         |               |                     |             |
|-------------------------------------------------------------------------|---------------|---------------------|-------------|
| Immunoglobulin heavy variable 1-3                                       | A0A0C4DH29    | IGHV1-3             | HV103       |
| Immunoglobulin heavy variable 1-45                                      | A0A0A0MS14    | IGHV1-45            | HV145       |
| Immunoglobulin heavy variable 1-46                                      | P01743        | IGHV1-46            | HV146       |
| Immunoglobulin heavy variable 1-69                                      | P01742        | IGHV1-69            | HV169       |
| Immunoglobulin heavy variable 1-69D                                     | A0A0B4J2H0    | IGHV1-69D           | HV69D       |
| Immunoglobulin heavy variable 1-8                                       | P0DP01        | IGHV1-8             | HV108       |
| Immunoglobulin heavy variable 2-26                                      | A0A0B4J1V2    | IGHV2-26            | HV226       |
| Immunoglobulin heavy variable 2-5                                       | P01817        | IGHV2-5             | HV205       |
| Immunoglobulin heavy variable 2-70                                      | P01814        | IGHV2-70            | HV270       |
| Immunoglobulin heavy variable 2-70D                                     | A0A0C4DH43    | IGHV2-70D           | HV70D       |
| Immunoglobulin heavy variable 3-13                                      | P01766        | IGHV3-13            | HV313       |
| Immunoglobulin heavy variable 3-15                                      | A0A0B4J1V0    | IGHV3-15            | HV315       |
| Immunoglobulin heavy variable 3-20                                      | A0A0C4DH32    | IGHV3-20            | HV320       |
| Immunoglobulin heavy variable 3-30;Immunoglobulin heavy variable 3-30-5 | P01768;P0DP03 | IGHV3-30;IGHV3-30-5 | HV330;HVC05 |
| Immunoglobulin heavy variable 3-49                                      | A0A0A0MS15    | IGHV3-49            | HV349       |
| Immunoglobulin heavy variable 3-53                                      | P01767        | IGHV3-53            | HV353       |
| Immunoglobulin heavy variable 3-64                                      | A0A075B6Q5    | IGHV3-64            | HV364       |
| Immunoglobulin heavy variable 3-64D                                     | A0A0J9YX35    | IGHV3-64D           | HV64D       |
| Immunoglobulin heavy variable 3-7                                       | P01780        | IGHV3-7             | HV307       |
| Immunoglobulin heavy variable 3-72                                      | A0A0B4J1Y9    | IGHV3-72            | HV372       |
| Immunoglobulin heavy variable 3-73                                      | A0A0B4J1V6    | IGHV3-73            | HV373       |
| Immunoglobulin heavy variable 3-74                                      | A0A0B4J1X5    | IGHV3-74            | HV374       |
| Immunoglobulin heavy variable 3-9;Immunoglobulin heavy variable 3-43D   | P01782;P0DP04 | IGHV3-9;IGHV3-43D   | HV309;HV43D |

|                                                                        |                   |                    |             |
|------------------------------------------------------------------------|-------------------|--------------------|-------------|
| Immunoglobulin heavy variable 4-28                                     | A0A0C4DH34        | IGHV4-28           | HV428       |
| Immunoglobulin heavy variable 4-34                                     | P06331            | IGHV4-34           | HV434       |
| Immunoglobulin heavy variable 4-4                                      | A0A075B6R2        | IGHV4-4            | HV404       |
| Immunoglobulin heavy variable 5-51                                     | A0A0C4DH38        | IGHV5-51           | HV551       |
| Immunoglobulin heavy variable 6-1                                      | A0A0B4J1U7        | IGHV6-1            | HV601       |
| Immunoglobulin J chain                                                 | P01591            | JCHAIN             | IGJ         |
| Immunoglobulin kappa constant                                          | P01834            | IGKC               | IGKC        |
| Immunoglobulin kappa light chain                                       | P0DOX7            |                    | IGK         |
| Immunoglobulin kappa variable 1-12;Immunoglobulin kappa variable 1D-12 | A0A0C4DH73;P01611 | IGKV1-12;IGKV1D-12 | KV112;KVD12 |
| Immunoglobulin kappa variable 1-16                                     | P04430            | IGKV1-16           | KV116       |
| Immunoglobulin kappa variable 1-17                                     | P01599            | IGKV1-17           | KV117       |
| Immunoglobulin kappa variable 1-27                                     | A0A075B6S5        | IGKV1-27           | KV127       |
| Immunoglobulin kappa variable 1-39;Immunoglobulin kappa variable 1D-39 | P01597;P04432     | IGKV1-39;IGKV1D-39 | KV139;KVD39 |
| Immunoglobulin kappa variable 1-5                                      | P01602            | IGKV1-5            | KV105       |
| Immunoglobulin kappa variable 1-8                                      | A0A0C4DH67        | IGKV1-8            | KV108       |
| Immunoglobulin kappa variable 1D-13;Immunoglobulin kappa variable 1-13 | A0A0B4J2D9;P0DP09 | IGKV1D-13;IGKV1-13 | KVD13;KV113 |
| Immunoglobulin kappa variable 1D-16                                    | P01601            | IGKV1D-16          | KVD16       |
| Immunoglobulin kappa variable 1D-33;Immunoglobulin kappa variable 1-33 | P01593;P01594     | IGKV1D-33;IGKV1-33 | KVD33;KV133 |
| Immunoglobulin kappa variable 1D-8                                     | A0A087WSZ0        | IGKV1D-8           | KVD08       |
| Immunoglobulin kappa variable 2-28;Immunoglobulin kappa variable 2D-28 | A0A075B6P5;P01615 | IGKV2-28;IGKV2D-28 | KV228;KVD28 |
| Immunoglobulin kappa variable 2-29                                     | A2NJV5            | IGKV2-29           | KV229       |

|                                                                        |                   |                    |             |
|------------------------------------------------------------------------|-------------------|--------------------|-------------|
| Immunoglobulin kappa variable 2-30                                     | P06310            | IGKV2-30           | KV230       |
| Immunoglobulin kappa variable 2-40;Immunoglobulin kappa variable 2D-40 | A0A087WW87;P01614 | IGKV2-40;IGKV2D-40 | KV240;KVD40 |
| Immunoglobulin kappa variable 2D-29                                    | A0A075B6S2        | IGKV2D-29          | KVD29       |
| Immunoglobulin kappa variable 3-11                                     | P04433            | IGKV3-11           | KV311       |
| Immunoglobulin kappa variable 3-15                                     | P01624            | IGKV3-15           | KV315       |
| Immunoglobulin kappa variable 3-20                                     | P01619            | IGKV3-20           | KV320       |
| Immunoglobulin kappa variable 3D-15                                    | A0A087WSY6        | IGKV3D-15          | KVD15       |
| Immunoglobulin kappa variable 3D-20                                    | A0A0C4DH25        | IGKV3D-20          | KVD20       |
| Immunoglobulin kappa variable 4-1                                      | P06312            | IGKV4-1            | KV401       |
| Immunoglobulin kappa variable 5-2                                      | P06315            | IGKV5-2            | KV502       |
| Immunoglobulin kappa variable 6D-21                                    | A0A0A0MT36        | IGKV6D-21          | KVD21       |
| Immunoglobulin lambda constant 2                                       | P0DOY2            | IGLC2              | IGLC2       |
| Immunoglobulin lambda constant 7                                       | A0M8Q6            | IGLC7              | IGLC7       |
| Immunoglobulin lambda variable 10-54                                   | A0A075B6I4        | IGLV10-54          | LVX54       |
| Immunoglobulin lambda variable 1-36                                    | A0A0B4J1U3        | IGLV1-36           | LV136       |
| Immunoglobulin lambda variable 1-40                                    | P01703            | IGLV1-40           | LV140       |
| Immunoglobulin lambda variable 1-44                                    | P01699            | IGLV1-44           | LV144       |
| Immunoglobulin lambda variable 1-47                                    | P01700            | IGLV1-47           | LV147       |
| Immunoglobulin lambda variable 1-51                                    | P01701            | IGLV1-51           | LV151       |
| Immunoglobulin lambda variable 2-11                                    | P01706            | IGLV2-11           | LV211       |
| Immunoglobulin lambda variable 2-14                                    | P01704            | IGLV2-14           | LV214       |
| Immunoglobulin lambda variable 2-18                                    | A0A075B6J9        | IGLV2-18           | LV218       |
| Immunoglobulin lambda variable 3-1                                     | P01715            | IGLV3-1            | LV301       |

|                                                                                                                                                            |                                   |          |       |
|------------------------------------------------------------------------------------------------------------------------------------------------------------|-----------------------------------|----------|-------|
| Immunoglobulin lambda variable 3-10                                                                                                                        | A0A075B6K4                        | IGLV3-10 | LV310 |
| Immunoglobulin lambda variable 3-12                                                                                                                        | A0A075B6K2                        | IGLV3-12 | LV312 |
| Immunoglobulin lambda variable 3-16                                                                                                                        | A0A075B6K0                        | IGLV3-16 | LV316 |
| Immunoglobulin lambda variable 3-19                                                                                                                        | P01714                            | IGLV3-19 | LV319 |
| Immunoglobulin lambda variable 3-21                                                                                                                        | P80748                            | IGLV3-21 | LV321 |
| Immunoglobulin lambda variable 3-25                                                                                                                        | P01717                            | IGLV3-25 | LV325 |
| Immunoglobulin lambda variable 3-9                                                                                                                         | A0A075B6K5                        | IGLV3-9  | LV39  |
| Immunoglobulin lambda variable 4-60                                                                                                                        | A0A075B6I1                        | IGLV4-60 | LV460 |
| Immunoglobulin lambda variable 4-69                                                                                                                        | A0A075B6H9                        | IGLV4-69 | LV469 |
| Immunoglobulin lambda variable 5-45                                                                                                                        | A0A087WSX0                        | IGLV5-45 | LV545 |
| Immunoglobulin lambda variable 6-57                                                                                                                        | P01721                            | IGLV6-57 | LV657 |
| Immunoglobulin lambda variable 7-46                                                                                                                        | A0A075B6I9                        | IGLV7-46 | LV746 |
| Immunoglobulin lambda variable 8-61                                                                                                                        | A0A075B6I0                        | IGLV8-61 | LV861 |
| Immunoglobulin lambda-1 light chain                                                                                                                        | P0DOX8                            |          | IGL1  |
| Immunoglobulin lambda-like polypeptide 1                                                                                                                   | P15814                            | IGLL1    | IGLL1 |
| Immunoglobulin mu heavy chain                                                                                                                              | P0DOX6                            |          | IGM   |
| Immunoglobulin superfamily containing leucine-rich repeat protein                                                                                          | O14498                            | ISLR     | ISLR  |
| Inhibin beta C chain                                                                                                                                       | P55103                            | INHBC    | INHBC |
| Insulin-like growth factor I;Isoform 2 of Insulin-like growth factor I;Isoform 3 of Insulin-like growth factor I;Isoform 4 of Insulin-like growth factor I | P05019;P05019-2;P05019-3;P05019-4 | IGF1     | IGF1  |
| Insulin-like growth factor II;Isoform 2 of Insulin-like growth factor II;Isoform 3 of Insulin-like growth factor II                                        | P01344;P01344-2;P01344-3          | IGF2     | IGF2  |
| Insulin-like growth factor-binding protein 2                                                                                                               | P18065                            | IGFBP2   | IBP2  |

|                                                                                                                                                            |                                            |        |       |
|------------------------------------------------------------------------------------------------------------------------------------------------------------|--------------------------------------------|--------|-------|
| Insulin-like growth factor-binding protein 3;Isoform 2 of Insulin-like growth factor-binding protein 3                                                     | P17936;P17936-2                            | IGFBP3 | IBP3  |
| Insulin-like growth factor-binding protein 4                                                                                                               | P22692                                     | IGFBP4 | IBP4  |
| Insulin-like growth factor-binding protein 5                                                                                                               | P24593                                     | IGFBP5 | IBP5  |
| Insulin-like growth factor-binding protein 6                                                                                                               | P24592                                     | IGFBP6 | IBP6  |
| Insulin-like growth factor-binding protein 7;Isoform 2 of Insulin-like growth factor-binding protein 7                                                     | Q16270;Q16270-2                            | IGFBP7 | IBP7  |
| Insulin-like growth factor-binding protein complex acid labile subunit;Isoform 2 of Insulin-like growth factor-binding protein complex acid labile subunit | P35858;P35858-2                            | IGFALS | ALS   |
| Integrin alpha-IIb                                                                                                                                         | P08514                                     | ITGA2B | ITA2B |
| Integrin beta-1;Isoform 2 of Integrin beta-1;Isoform 3 of Integrin beta-1;Isoform 4 of Integrin beta-1;Isoform 5 of Integrin beta-1                        | P05556;P05556-2;P05556-3;P05556-4;P05556-5 | ITGB1  | ITB1  |
| Integrin beta-3                                                                                                                                            | P05106                                     | ITGB3  | ITB3  |
| Inter-alpha-trypsin inhibitor heavy chain H1                                                                                                               | P19827                                     | ITIH1  | ITIH1 |
| Inter-alpha-trypsin inhibitor heavy chain H2                                                                                                               | P19823                                     | ITIH2  | ITIH2 |
| Inter-alpha-trypsin inhibitor heavy chain H3;Isoform 2 of Inter-alpha-trypsin inhibitor heavy chain H3                                                     | Q06033;Q06033-2                            | ITIH3  | ITIH3 |
| Inter-alpha-trypsin inhibitor heavy chain H4                                                                                                               | Q14624                                     | ITIH4  | ITIH4 |
| Intercellular adhesion molecule 1                                                                                                                          | P05362                                     | ICAM1  | ICAM1 |
| Intercellular adhesion molecule 2                                                                                                                          | P13598                                     | ICAM2  | ICAM2 |
| Interleukin-1 receptor accessory protein;Isoform 2 of Interleukin-1 receptor accessory protein;Isoform 4 of Interleukin-1 receptor accessory protein       | Q9NPH3;Q9NPH3-2;Q9NPH3-5                   | IL1RAP | IL1AP |



|                                                                                                                                                                                                    |                                              |          |       |
|----------------------------------------------------------------------------------------------------------------------------------------------------------------------------------------------------|----------------------------------------------|----------|-------|
| Interleukin-6 receptor subunit beta;Isoform 3 of Interleukin-6 receptor subunit beta                                                                                                               | P40189;P40189-3                              | IL6ST    | IL6RB |
| Isocitrate dehydrogenase [NADP], mitochondrial;Isoform 2 of Isocitrate dehydrogenase [NADP], mitochondrial                                                                                         | P48735;P48735-2                              | IDH2     | IDHP  |
| Isoform 1 of Fibronectin                                                                                                                                                                           | P02751-1                                     | FN1      | FINC  |
| Isoform 2 of Alpha-1B-glycoprotein                                                                                                                                                                 | P04217-2                                     | A1BG     | A1BG  |
| Isoform 2 of Attractin                                                                                                                                                                             | O75882-2                                     | ATRN     | ATRN  |
| Isoform 2 of Inter-alpha-trypsin inhibitor heavy chain H4                                                                                                                                          | Q14624-2                                     | ITIH4    | ITIH4 |
| Isoform 2 of Mannan-binding lectin serine protease 1                                                                                                                                               | P48740-2                                     | MASP1    | MASP1 |
| Isoform 2 of Tropomyosin alpha-3 chain;Isoform 3 of Tropomyosin alpha-3 chain;Isoform 4 of Tropomyosin alpha-3 chain;Isoform 5 of Tropomyosin alpha-3 chain;Isoform 6 of Tropomyosin alpha-3 chain | P06753-2;P06753-3;P06753-4;P06753-5;P06753-6 | TPM3     | TPM3  |
| Isoform 3 of Ligand-dependent corepressor                                                                                                                                                          | Q96JN0-3                                     | LCOR     | LCOR  |
| Isoform 4 of Inter-alpha-trypsin inhibitor heavy chain H4                                                                                                                                          | Q14624-4                                     | ITIH4    | ITIH4 |
| Isoform 5 of Fibronectin                                                                                                                                                                           | P02751-5                                     | FN1      | FINC  |
| Isoform 6 of Clusterin                                                                                                                                                                             | P10909-6                                     | CLU      | CLUS  |
| Isoform 9 of Fibronectin                                                                                                                                                                           | P02751-9                                     | FN1      | FINC  |
| Isoform A of Megakaryocyte and platelet inhibitory receptor G6b;Isoform D of Megakaryocyte and platelet inhibitory receptor G6b                                                                    | O95866-2;O95866-4                            | MPIG6B   | G6B   |
| Isoform C of Fibulin-1                                                                                                                                                                             | P23142-4                                     | FBLN1    | FBLN1 |
| Isoform C of Proteoglycan 4                                                                                                                                                                        | Q92954-3                                     | PRG4     | PRG4  |
| Isoform LMW of Kininogen-1                                                                                                                                                                         | P01042-2                                     | KNG1     | KNG1  |
| Junction plakoglobin                                                                                                                                                                               | P14923                                       | JUP      | PLAK  |
| Kallistatin                                                                                                                                                                                        | P29622                                       | SERPINA4 | KAIN  |
| Keratin, type I cytoskeletal 10                                                                                                                                                                    | P13645                                       | KRT10    | K1C10 |
| Keratin, type I cytoskeletal 13                                                                                                                                                                    | P13646                                       | KRT13    | K1C13 |
| Keratin, type I cytoskeletal 14                                                                                                                                                                    | P02533                                       | KRT14    | K1C14 |
| Keratin, type I cytoskeletal 16                                                                                                                                                                    | P08779                                       | KRT16    | K1C16 |
| Keratin, type I cytoskeletal 17                                                                                                                                                                    | Q04695                                       | KRT17    | K1C17 |

|                                                                                                                                                                                                                                                                                                                                                      |                                            |                         |                         |
|------------------------------------------------------------------------------------------------------------------------------------------------------------------------------------------------------------------------------------------------------------------------------------------------------------------------------------------------------|--------------------------------------------|-------------------------|-------------------------|
| Keratin, type I cytoskeletal 9                                                                                                                                                                                                                                                                                                                       | P35527                                     | KRT9                    | K1C9                    |
| Keratin, type II cuticular Hb6;Keratin, type II cuticular Hb3;Keratin, type II cuticular Hb5;Keratin, type II cuticular Hb1                                                                                                                                                                                                                          | O43790;P78385;P78386;Q14533                | KRT86;KRT83;KRT85;KRT81 | KRT86;KRT83;KRT85;KRT81 |
| Keratin, type II cytoskeletal 1                                                                                                                                                                                                                                                                                                                      | P04264                                     | KRT1                    | K2C1                    |
| Keratin, type II cytoskeletal 2 epidermal                                                                                                                                                                                                                                                                                                            | P35908                                     | KRT2                    | K22E                    |
| Keratin, type II cytoskeletal 4                                                                                                                                                                                                                                                                                                                      | P19013                                     | KRT4                    | K2C4                    |
| Keratin, type II cytoskeletal 5                                                                                                                                                                                                                                                                                                                      | P13647                                     | KRT5                    | K2C5                    |
| Keratin, type II cytoskeletal 6A                                                                                                                                                                                                                                                                                                                     | P02538                                     | KRT6A                   | K2C6A                   |
| Keratin, type II cytoskeletal 6B                                                                                                                                                                                                                                                                                                                     | P04259                                     | KRT6B                   | K2C6B                   |
| Keratin, type II cytoskeletal 78                                                                                                                                                                                                                                                                                                                     | Q8N1N4                                     | KRT78                   | K2C78                   |
| Keratinocyte proline-rich protein                                                                                                                                                                                                                                                                                                                    | Q5T749                                     | KPRP                    | KPRP                    |
| Killer cell immunoglobulin-like receptor 2DS5;Killer cell immunoglobulin-like receptor 2DS1                                                                                                                                                                                                                                                          | Q14953;Q14954                              | KIR2DS5;KIR2DS1         | KI2S5;KI2S1             |
| Kininogen-1                                                                                                                                                                                                                                                                                                                                          | P01042                                     | KNG1                    | KNG1                    |
| Lactotransferrin;Isoform DeltaLf of Lactotransferrin                                                                                                                                                                                                                                                                                                 | P02788;P02788-2                            | LTF                     | TRFL                    |
| Latent-transforming growth factor beta-binding protein 1;Isoform Short of Latent-transforming growth factor beta-binding protein 1;Isoform 3 of Latent-transforming growth factor beta-binding protein 1;Isoform 4 of Latent-transforming growth factor beta-binding protein 1;Isoform 5 of Latent-transforming growth factor beta-binding protein 1 | Q14766;Q14766-2;Q14766-3;Q14766-4;Q14766-5 | LTBP1                   | LTBP1                   |
| Leucine-rich alpha-2-glycoprotein                                                                                                                                                                                                                                                                                                                    | P02750                                     | LRG1                    | A2GL                    |
| Leukocyte immunoglobulin-like receptor subfamily A member 3;Isoform 3 of Leukocyte immunoglobulin-like receptor subfamily A member 3                                                                                                                                                                                                                 | Q8N6C8;Q8N6C8-3                            | LILRA3                  | LIRA3                   |
| LINE-1 type transposase domain-containing protein 1                                                                                                                                                                                                                                                                                                  | Q5T7N2                                     | L1TD1                   | LITD1                   |
| Lipopolysaccharide-binding protein                                                                                                                                                                                                                                                                                                                   | P18428                                     | LBP                     | LBP                     |

|                                                                                                                                                                           |                          |        |       |
|---------------------------------------------------------------------------------------------------------------------------------------------------------------------------|--------------------------|--------|-------|
| L-lactate dehydrogenase A chain;Isoform 3 of L-lactate dehydrogenase A chain;Isoform 4 of L-lactate dehydrogenase A chain                                                 | P00338;P00338-3;P00338-4 | LDHA   | LDHA  |
| L-lactate dehydrogenase B chain                                                                                                                                           | P07195                   | LDHB   | LDHB  |
| Low affinity immunoglobulin gamma Fc region receptor III-A                                                                                                                | P08637                   | FCGR3A | FCG3A |
| L-selectin;Isoform 2 of L-selectin                                                                                                                                        | P14151;P14151-2          | SELL   | LYAM1 |
| Lumican                                                                                                                                                                   | P51884                   | LUM    | LUM   |
| Lymphatic vessel endothelial hyaluronic acid receptor 1                                                                                                                   | Q9Y5Y7                   | LYVE1  | LYVE1 |
| Lysosome-associated membrane glycoprotein 1;Isoform 2 of Lysosome-associated membrane glycoprotein 1                                                                      | P11279;P11279-2          | LAMP1  | LAMP1 |
| Lysosome-associated membrane glycoprotein 2;Isoform LAMP-2B of Lysosome-associated membrane glycoprotein 2;Isoform LAMP-2C of Lysosome-associated membrane glycoprotein 2 | P13473;P13473-2;P13473-3 | LAMP2  | LAMP2 |
| Lysozyme C                                                                                                                                                                | P61626                   | LYZ    | LYSC  |
| Macrophage colony-stimulating factor 1 receptor                                                                                                                           | P07333                   | CSF1R  | CSF1R |
| Macrophage mannose receptor 1                                                                                                                                             | P22897                   | MRC1   | MRC1  |
| Macrophage receptor MARCO;Isoform 2 of Macrophage receptor MARCO                                                                                                          | Q9UEW3;Q9UEW3-2          | MARCO  | MARCO |
| Mannan-binding lectin serine protease 1                                                                                                                                   | P48740                   | MASP1  | MASP1 |
| Mannan-binding lectin serine protease 2                                                                                                                                   | O00187                   | MASP2  | MASP2 |
| Mannose-binding protein C                                                                                                                                                 | P11226                   | MBL2   | MBL2  |
| Mannosyl-oligosaccharide 1,2-alpha-mannosidase IA                                                                                                                         | P33908                   | MAN1A1 | MA1A1 |
| Mast/stem cell growth factor receptor Kit;Isoform 2 of Mast/stem cell growth factor receptor Kit                                                                          | P10721;P10721-2          | KIT    | KIT   |
| Matrix Gla protein;Isoform 2 of Matrix Gla protein                                                                                                                        | P08493;P08493-2          | MGP    | MGP   |

|                                                                                                                                                                                                                                                                                                                                                                                                                                                                                                   |                                                                                 |                         |                         |
|---------------------------------------------------------------------------------------------------------------------------------------------------------------------------------------------------------------------------------------------------------------------------------------------------------------------------------------------------------------------------------------------------------------------------------------------------------------------------------------------------|---------------------------------------------------------------------------------|-------------------------|-------------------------|
| Membrane primary amine oxidase                                                                                                                                                                                                                                                                                                                                                                                                                                                                    | Q16853                                                                          | AOC3                    | AOC3                    |
| Metal transporter CNNM4;Isoform 2 of Metal transporter CNNM4;Metal transporter CNNM2;Isoform 2 of Metal transporter CNNM2                                                                                                                                                                                                                                                                                                                                                                         | Q6P4Q7;Q6P4Q7-2;Q9H8M5;Q9H8M5-2                                                 | CNNM4;CNNM4;CNNM2;CNNM2 | CNNM4;CNNM4;CNNM2;CNNM2 |
| Metalloproteinase inhibitor 2                                                                                                                                                                                                                                                                                                                                                                                                                                                                     | P16035                                                                          | TIMP2                   | TIMP2                   |
| Microtubule-associated protein 1S;Isoform 2 of Microtubule-associated protein 1S                                                                                                                                                                                                                                                                                                                                                                                                                  | Q66K74;Q66K74-2                                                                 | MAP1S                   | MAP1S                   |
| Monocyte differentiation antigen CD14                                                                                                                                                                                                                                                                                                                                                                                                                                                             | P08571                                                                          | CD14                    | CD14                    |
| Multimerin-1                                                                                                                                                                                                                                                                                                                                                                                                                                                                                      | Q13201                                                                          | MMRN1                   | MMRN1                   |
| Multimerin-2                                                                                                                                                                                                                                                                                                                                                                                                                                                                                      | Q9H8L6                                                                          | MMRN2                   | MMRN2                   |
| Multiple epidermal growth factor-like domains protein 9                                                                                                                                                                                                                                                                                                                                                                                                                                           | Q9H1U4                                                                          | MEGF9                   | MEGF9                   |
| Multiple inositol polyphosphate phosphatase 1                                                                                                                                                                                                                                                                                                                                                                                                                                                     | Q9UNW1                                                                          | MINPP1                  | MINP1                   |
| Myelin basic protein;Isoform 2 of Myelin basic protein;Isoform 3 of Myelin basic protein;Isoform 4 of Myelin basic protein;Isoform 5 of Myelin basic protein;Isoform 6 of Myelin basic protein                                                                                                                                                                                                                                                                                                    | P02686;P02686-2;P02686-3;P02686-4;P02686-5;P02686-6                             | MBP                     | MBP                     |
| Myosin light chain kinase, smooth muscle;Isoform 9 of Myosin light chain kinase, smooth muscle;Isoform 2 of Myosin light chain kinase, smooth muscle;Isoform 3A of Myosin light chain kinase, smooth muscle;Isoform 3B of Myosin light chain kinase, smooth muscle;Isoform 4 of Myosin light chain kinase, smooth muscle;Isoform Del-1790 of Myosin light chain kinase, smooth muscle;Isoform 5 of Myosin light chain kinase, smooth muscle;Isoform 7 of Myosin light chain kinase, smooth muscle | Q15746;Q15746-11;Q15746-2;Q15746-3;Q15746-4;Q15746-5;Q15746-6;Q15746-7;Q15746-9 | MYLK                    | MYLK                    |
| Myosin light polypeptide 6;Isoform Smooth muscle of Myosin light polypeptide 6                                                                                                                                                                                                                                                                                                                                                                                                                    | P60660;P60660-2                                                                 | MYL6                    | MYL6                    |

|                                                                                                                                                                                                                                                                                                                        |                                                                                             |               |             |
|------------------------------------------------------------------------------------------------------------------------------------------------------------------------------------------------------------------------------------------------------------------------------------------------------------------------|---------------------------------------------------------------------------------------------|---------------|-------------|
| Myosin regulatory light chain 12B;Myosin regulatory light chain 12A                                                                                                                                                                                                                                                    | O14950;P19105                                                                               | MYL12B;MYL12A | ML12B;ML12A |
| Myosin regulatory light polypeptide 9                                                                                                                                                                                                                                                                                  | P24844                                                                                      | MYL9          | MYL9        |
| Myosin-9                                                                                                                                                                                                                                                                                                               | P35579                                                                                      | MYH9          | MYH9        |
| N-acetylmuramoyl-L-alanine amidase                                                                                                                                                                                                                                                                                     | Q96PD5                                                                                      | PGLYRP2       | PGRP2       |
| NADH-cytochrome b5 reductase 3;Isoform 2 of NADH-cytochrome b5 reductase 3;Isoform 3 of NADH-cytochrome b5 reductase 3                                                                                                                                                                                                 | P00387;P00387-2;P00387-3                                                                    | CYB5R3        | NB5R3       |
| Neural cell adhesion molecule 1;Isoform 2 of Neural cell adhesion molecule 1;Isoform 3 of Neural cell adhesion molecule 1;Isoform 4 of Neural cell adhesion molecule 1                                                                                                                                                 | P13591;P13591-1;P13591-3;P13591-4                                                           | NCAM1         | NCAM1       |
| Neural cell adhesion molecule L1-like protein;Isoform 2 of Neural cell adhesion molecule L1-like protein                                                                                                                                                                                                               | O00533;O00533-2                                                                             | CHL1          | NCHL1       |
| Neurogranin                                                                                                                                                                                                                                                                                                            | Q92686                                                                                      | NRGN          | NEUG        |
| Neuron navigator 2;Isoform 10 of Neuron navigator 2;Isoform 11 of Neuron navigator 2;Isoform 12 of Neuron navigator 2;Isoform 13 of Neuron navigator 2;Isoform 2 of Neuron navigator 2;Isoform 3 of Neuron navigator 2;Isoform 4 of Neuron navigator 2;Isoform 8 of Neuron navigator 2;Isoform 9 of Neuron navigator 2 | Q8IVL1;Q8IVL1-10;Q8IVL1-11;Q8IVL1-12;Q8IVL1-13;Q8IVL1-2;Q8IVL1-3;Q8IVL1-4;Q8IVL1-8;Q8IVL1-9 | NAV2          | NAV2        |
| Neuropilin-1;Isoform 2 of Neuropilin-1;Isoform 3 of Neuropilin-1                                                                                                                                                                                                                                                       | O14786;O14786-2;O14786-3                                                                    | NRP1          | NRP1        |
| Neutrophil defensin 1;Neutrophil defensin 3                                                                                                                                                                                                                                                                            | P59665;P59666                                                                               | DEFA1;DEFA3   | DEF1;DEF3   |
| Noelin;Isoform 3 of Noelin;Isoform 5 of Noelin                                                                                                                                                                                                                                                                         | Q99784;Q99784-3;Q99784-5                                                                    | OLFM1         | NOE1        |

|                                                                                                                                                                                 |                                            |          |       |
|---------------------------------------------------------------------------------------------------------------------------------------------------------------------------------|--------------------------------------------|----------|-------|
| NPC1-like intracellular cholesterol transporter 1;Isoform 2 of NPC1-like intracellular cholesterol transporter 1;Isoform 4 of NPC1-like intracellular cholesterol transporter 1 | Q9UHC9;Q9UHC9-2;Q9UHC9-4                   | NPC1L1   | NPCL1 |
| Obscurin;Isoform 2 of Obscurin;Isoform 5 of Obscurin                                                                                                                            | Q5VST9;Q5VST9-2;Q5VST9-6                   | OBSCN    | OBSCN |
| Oncoprotein-induced transcript 3 protein                                                                                                                                        | Q8WWZ8                                     | OIT3     | OIT3  |
| Oncostatin-M-specific receptor subunit beta;Isoform 2 of Oncostatin-M-specific receptor subunit beta                                                                            | Q99650;Q99650-2                            | OSMR     | OSMR  |
| Pantetheinase                                                                                                                                                                   | O95497                                     | VNN1     | VNN1  |
| PDZ and LIM domain protein 1                                                                                                                                                    | O00151                                     | PDLIM1   | PDLI1 |
| Peptidase inhibitor 16;Isoform 2 of Peptidase inhibitor 16                                                                                                                      | Q6UXB8;Q6UXB8-2                            | PI16     | PI16  |
| Peptidyl-prolyl cis-trans isomerase A                                                                                                                                           | P62937                                     | PPIA     | PPIA  |
| Periostin;Isoform 2 of Periostin;Isoform 3 of Periostin;Isoform 4 of Periostin;Isoform 5 of Periostin                                                                           | Q15063;Q15063-2;Q15063-3;Q15063-4;Q15063-5 | POSTN    | POSTN |
| Peroxiredoxin-1                                                                                                                                                                 | Q06830                                     | PRDX1    | PRDX1 |
| Peroxiredoxin-2                                                                                                                                                                 | P32119                                     | PRDX2    | PRDX2 |
| Peroxiredoxin-6                                                                                                                                                                 | P30041                                     | PRDX6    | PRDX6 |
| Phosphatidylcholine-sterol acyltransferase                                                                                                                                      | P04180                                     | LCAT     | LCAT  |
| Phosphatidylinositol-glycan-specific phospholipase D                                                                                                                            | P80108                                     | GPLD1    | PHLD  |
| Phospholipid transfer protein                                                                                                                                                   | P55058                                     | PLTP     | PLTP  |
| Pigment epithelium-derived factor                                                                                                                                               | P36955                                     | SERPINF1 | PEDF  |
| Plasma kallikrein                                                                                                                                                               | P03952                                     | KLKB1    | KLKB1 |
| Plasma protease C1 inhibitor;Isoform 3 of Plasma protease C1 inhibitor                                                                                                          | P05155;P05155-3                            | SERPING1 | IC1   |
| Plasma serine protease inhibitor                                                                                                                                                | P05154                                     | SERPINA5 | IPSP  |
| Plasminogen                                                                                                                                                                     | P00747                                     | PLG      | PLMN  |
| Plasminogen-like protein A                                                                                                                                                      | Q15195                                     | PLGLA    | PLGA  |
| Plastin-2                                                                                                                                                                       | P13796                                     | LCP1     | PLSL  |
| Platelet basic protein                                                                                                                                                          | P02775                                     | PPBP     | CXCL7 |
| Platelet factor 4                                                                                                                                                               | P02776                                     | PF4      | PLF4  |
| Platelet factor 4 variant                                                                                                                                                       | P10720                                     | PF4V1    | PF4V  |

|                                                                                                                                                                                                                                    |                                   |                      |                    |
|------------------------------------------------------------------------------------------------------------------------------------------------------------------------------------------------------------------------------------|-----------------------------------|----------------------|--------------------|
| Platelet glycoprotein Ib alpha chain                                                                                                                                                                                               | P07359                            | GP1BA                | GP1BA              |
| Platelet glycoprotein Ib beta chain;Isoform 2 of Platelet glycoprotein Ib beta chain                                                                                                                                               | P13224;P13224-2                   | GP1BB                | GP1BB              |
| Platelet glycoprotein IX                                                                                                                                                                                                           | P14770                            | GP9                  | GPIX               |
| Platelet glycoprotein V                                                                                                                                                                                                            | P40197                            | GP5                  | GPV                |
| Pleckstrin                                                                                                                                                                                                                         | P08567                            | PLEK                 | PLEK               |
| Plexin domain-containing protein 2                                                                                                                                                                                                 | Q6UX71                            | PLXDC2               | PXDC2              |
| Plexin-B1;Isoform 2 of Plexin-B1;Isoform 3 of Plexin-B1                                                                                                                                                                            | O43157;O43157-2;O43157-3          | PLXNB1               | PLXB1              |
| Podocalyxin;Isoform 2 of Podocalyxin                                                                                                                                                                                               | O00592;O00592-2                   | PODXL                | PODXL              |
| Poliovirus receptor;Isoform Beta of Poliovirus receptor;Isoform Gamma of Poliovirus receptor;Isoform Delta of Poliovirus receptor                                                                                                  | P15151;P15151-2;P15151-3;P15151-4 | PVR                  | PVR                |
| Polyamine-modulated factor 1-binding protein 1;Isoform 1 of Polyamine-modulated factor 1-binding protein 1;Isoform 3 of Polyamine-modulated factor 1-binding protein 1;Isoform 4 of Polyamine-modulated factor 1-binding protein 1 | Q8TBY8;Q8TBY8-1;Q8TBY8-3;Q8TBY8-4 | PMFBP1               | PMFBP              |
| Polymeric immunoglobulin receptor                                                                                                                                                                                                  | P01833                            | PIGR                 | PIGR               |
| Polyubiquitin-B;Polyubiquitin-C;Ubiquitin-40S ribosomal protein S27a;Ubiquitin-60S ribosomal protein L40                                                                                                                           | P0CG47;P0CG48;P62979;P62987       | UBB;UBC;RPS27A;UBA52 | UBB;UBC;RS27A;RL40 |
| PRA1 family protein 3                                                                                                                                                                                                              | O75915                            | ARL6IP5              | PRAF3              |
| Pregnancy zone protein                                                                                                                                                                                                             | P20742                            | PZP                  | PZP                |
| Pregnancy-specific beta-1-glycoprotein 9;Isoform 2 of Pregnancy-specific beta-1-glycoprotein 9                                                                                                                                     | Q00887;Q00887-2                   | PSG9                 | PSG9               |
| Pre-mRNA-processing factor 40 homolog B;Isoform 2 of Pre-mRNA-processing factor 40 homolog B;Isoform 3 of Pre-mRNA-processing factor 40 homolog B                                                                                  | Q6NWX9;Q6NWX9-2;Q6NWX9-3          | PRPF40B              | PR40B              |
| Preylcysteine oxidase 1                                                                                                                                                                                                            | Q9UHG3                            | PCYOX1               | PCYOX              |

|                                                                                                                                                                |                                   |                    |             |
|----------------------------------------------------------------------------------------------------------------------------------------------------------------|-----------------------------------|--------------------|-------------|
| Probable non-functional immunoglobulin heavy variable 3-35                                                                                                     | A0A0C4DH35                        | IGHV3-35           | HV335       |
| Probable non-functional immunoglobulin heavy variable 3-38                                                                                                     | A0A0C4DH36                        | IGHV3-38           | HV338       |
| Probable non-functional immunoglobulin kappa variable 2D-24;Immunoglobulin kappa variable 2-24                                                                 | A0A075B6R9;A0A0C4DH68             | IGKV2D-24;IGKV2-24 | KVD24;KV224 |
| Probable non-functional immunoglobulin kappa variable 1-37;Probable non-functional immunoglobulin kappa variable 1D-37                                         | A0A075B6S9;P0DSN7                 | IGKV1-37;IGKV1D-37 | KV137;KVD37 |
| Procollagen C-endopeptidase enhancer 1                                                                                                                         | Q15113                            | PCOLCE             | PCOC1       |
| Profilin-1                                                                                                                                                     | P07737                            | PFN1               | PROF1       |
| Progranulin;Isoform 2 of Progranulin;Isoform 3 of Progranulin                                                                                                  | P28799;P28799-2;P28799-3          | GRN                | GRN         |
| Prolactin-inducible protein                                                                                                                                    | P12273                            | PIP                | PIP         |
| Proline-rich acidic protein 1;Isoform 2 of Proline-rich acidic protein 1;Isoform 3 of Proline-rich acidic protein 1;Isoform 4 of Proline-rich acidic protein 1 | Q96NZ9;Q96NZ9-2;Q96NZ9-3;Q96NZ9-4 | PRAP1              | PRAP1       |
| Prolow-density lipoprotein receptor-related protein 1                                                                                                          | Q07954                            | LRP1               | LRP1        |
| Properdin                                                                                                                                                      | P27918                            | CFP                | PROP        |
| Proprotein convertase subtilisin/kexin type 9                                                                                                                  | Q8NBP7                            | PCSK9              | PCSK9       |
| Prosaposin;Isoform Sap-mu-6 of Prosaposin;Isoform Sap-mu-9 of Prosaposin                                                                                       | P07602;P07602-2;P07602-3          | PSAP               | SAP         |
| Prostaglandin-H2 D-isomerase                                                                                                                                   | P41222                            | PTGDS              | PTGDS       |
| Protein AMBP                                                                                                                                                   | P02760                            | AMBP               | AMBP        |
| Protein disulfide-isomerase A3                                                                                                                                 | P30101                            | PDIA3              | PDIA3       |
| Protein MENT;Isoform 2 of Protein MENT                                                                                                                         | Q9BUN1;Q9BUN1-2                   | MENT               | MENT        |
| Protein S100-A8                                                                                                                                                | P05109                            | S100A8             | S10A8       |
| Protein S100-A9                                                                                                                                                | P06702                            | S100A9             | S10A9       |
| Protein Z-dependent protease inhibitor                                                                                                                         | Q9UK55                            | SERPINA10          | ZPI         |
| Prothrombin                                                                                                                                                    | P00734                            | F2                 | THRB        |
| P-selectin                                                                                                                                                     | P16109                            | SELP               | LYAM3       |



|                                                                                                                                           |                                                     |         |       |
|-------------------------------------------------------------------------------------------------------------------------------------------|-----------------------------------------------------|---------|-------|
| Pulmonary surfactant-associated protein B                                                                                                 | P07988                                              | SFTPB   | PSPB  |
| Purine nucleoside phosphorylase                                                                                                           | P00491                                              | PNP     | PNPH  |
| Pyruvate kinase PKM;Isoform M1 of Pyruvate kinase PKM                                                                                     | P14618;P14618-2                                     | PKM     | KPYM  |
| Ras suppressor protein 1;Isoform 2 of Ras suppressor protein 1                                                                            | Q15404;Q15404-2                                     | RSU1    | RSU1  |
| Ras-related protein Rab-27B                                                                                                               | O00194                                              | RAB27B  | RB27B |
| Ras-related protein Rap-1b;Isoform 3 of Ras-related protein Rap-1b                                                                        | P61224;P61224-3                                     | RAP1B   | RAP1B |
| Receptor-type tyrosine-protein phosphatase eta;Isoform 2 of Receptor-type tyrosine-protein phosphatase eta                                | Q12913;Q12913-2                                     | PTPRJ   | PTPRJ |
| Receptor-type tyrosine-protein phosphatase F;Isoform 2 of Receptor-type tyrosine-protein phosphatase F                                    | P10586;P10586-2                                     | PTPRF   | PTPRF |
| Receptor-type tyrosine-protein phosphatase gamma;Isoform 2 of Receptor-type tyrosine-protein phosphatase gamma                            | P23470;P23470-2                                     | PTPRG   | PTPRG |
| Reticulon-4;Isoform B of Reticulon-4;Isoform C of Reticulon-4;Isoform 6 of Reticulon-4;Isoform B2 of Reticulon-4;Isoform D of Reticulon-4 | Q9NQC3;Q9NQC3-2;Q9NQC3-3;Q9NQC3-4;Q9NQC3-5;Q9NQC3-6 | RTN4    | RTN4  |
| Retinoic acid receptor responder protein 2                                                                                                | Q99969                                              | RARRES2 | RARR2 |
| Retinol-binding protein 4                                                                                                                 | P02753                                              | RBP4    | RET4  |
| Ribonuclease 4                                                                                                                            | P34096                                              | RNASE4  | RNAS4 |
| Ribonuclease pancreatic                                                                                                                   | P07998                                              | RNASE1  | RNAS1 |
| Ribosomal RNA processing protein 1 homolog A                                                                                              | P56182                                              | RRP1    | RRP1  |
| SAFB-like transcription modulator                                                                                                         | Q9NWH9                                              | SLTM    | SLTM  |
| Salivary acidic proline-rich phosphoprotein 1/2                                                                                           | P02810                                              | PRH1    | PRPC  |

|                                                                                                                                                                                                                                                            |                                   |               |             |
|------------------------------------------------------------------------------------------------------------------------------------------------------------------------------------------------------------------------------------------------------------|-----------------------------------|---------------|-------------|
| Scavenger receptor cysteine-rich type 1 protein M130;Isoform 2 of Scavenger receptor cysteine-rich type 1 protein M130;Isoform 3 of Scavenger receptor cysteine-rich type 1 protein M130;Isoform 4 of Scavenger receptor cysteine-rich type 1 protein M130 | Q86VB7;Q86VB7-2;Q86VB7-3;Q86VB7-4 | CD163         | C163A       |
| Secreted phosphoprotein 24                                                                                                                                                                                                                                 | Q13103                            | SPP2          | SPP24       |
| Selenoprotein P                                                                                                                                                                                                                                            | P49908                            | SELENOP       | SEPP1       |
| Semaphorin-5A                                                                                                                                                                                                                                              | Q13591                            | SEMA5A        | SEM5A       |
| Semaphorin-6A;Isoform 2 of Semaphorin-6A                                                                                                                                                                                                                   | Q9H2E6;Q9H2E6-2                   | SEMA6A        | SEM6A       |
| Serine palmitoyltransferase 2;Serine palmitoyltransferase 3                                                                                                                                                                                                | O15270;Q9NUV7                     | SPTLC2;SPTLC3 | SPTC2;SPTC3 |
| Serine/threonine-protein kinase/endoribonuclease IRE1                                                                                                                                                                                                      | O75460                            | ERN1          | ERN1        |
| Serotransferrin                                                                                                                                                                                                                                            | P02787                            | TF            | TRFE        |
| Serpin A11                                                                                                                                                                                                                                                 | Q86U17                            | SERPINA11     | SPA11       |
| Serum albumin                                                                                                                                                                                                                                              | P02768                            | ALB           | ALBU        |
| Serum amyloid A-1 protein                                                                                                                                                                                                                                  | PODJI8                            | SAA1          | SAA1        |
| Serum amyloid A-2 protein                                                                                                                                                                                                                                  | PODJI9                            | SAA2          | SAA2        |
| Serum amyloid A-4 protein                                                                                                                                                                                                                                  | P35542                            | SAA4          | SAA4        |
| Serum amyloid P-component                                                                                                                                                                                                                                  | P02743                            | APCS          | SAMP        |
| Serum paraoxonase/arylesterase 1                                                                                                                                                                                                                           | P27169                            | PON1          | PON1        |
| Serum paraoxonase/lactonase 3                                                                                                                                                                                                                              | Q15166                            | PON3          | PON3        |
| Sex hormone-binding globulin                                                                                                                                                                                                                               | P04278                            | SHBG          | SHBG        |
| SH3 domain-binding glutamic acid-rich-like protein 3                                                                                                                                                                                                       | Q9H299                            | SH3BGL3       | SH3L3       |
| Small RNA 2'-O-methyltransferase                                                                                                                                                                                                                           | Q5T8I9                            | HENMT1        | HENMT       |
| Sodium- and chloride-dependent transporter XTRP3;Isoform 2 of Sodium- and chloride-dependent transporter XTRP3                                                                                                                                             | Q9NP91;Q9NP91-2                   | SLC6A20       | S6A20       |
| Soluble scavenger receptor cysteine-rich domain-containing protein SSC5D                                                                                                                                                                                   | A1L4H1                            | SSC5D         | SRCRL       |
| Solute carrier family 2, facilitated glucose transporter member 3                                                                                                                                                                                          | P11169                            | SLC2A3        | GTR3        |
| SPARC                                                                                                                                                                                                                                                      | P09486                            | SPARC         | SPRC        |
| SPARC-like protein 1                                                                                                                                                                                                                                       | Q14515                            | SPARCL1       | SPRL1       |

|                                                                                                                                                                                                                                                                                                         |                                                     |          |       |
|---------------------------------------------------------------------------------------------------------------------------------------------------------------------------------------------------------------------------------------------------------------------------------------------------------|-----------------------------------------------------|----------|-------|
| Sulfhydryl oxidase 1                                                                                                                                                                                                                                                                                    | O00391                                              | QSOX1    | QSOX1 |
| Superoxide dismutase [Cu-Zn]                                                                                                                                                                                                                                                                            | P00441                                              | SOD1     | SODC  |
| Talin-1                                                                                                                                                                                                                                                                                                 | Q9Y490                                              | TLN1     | TLN1  |
| Target of Nesh-SH3;Isoform 2 of Target of Nesh-SH3;Isoform 3 of Target of Nesh-SH3;Isoform 4 of Target of Nesh-SH3                                                                                                                                                                                      | Q7Z7G0;Q7Z7G0-2;Q7Z7G0-3;Q7Z7G0-4                   | ABI3BP   | TARSH |
| Tenascin;Isoform 2 of Tenascin;Isoform 3 of Tenascin;Isoform 4 of Tenascin;Isoform 5 of Tenascin;Isoform 6 of Tenascin                                                                                                                                                                                  | P24821;P24821-2;P24821-3;P24821-4;P24821-5;P24821-6 | TNC      | TENA  |
| Tenascin-X;Isoform 3 of Tenascin-X;Isoform 5 of Tenascin-X                                                                                                                                                                                                                                              | P22105;P22105-1;P22105-4                            | TNXB     | TENX  |
| Tetranectin                                                                                                                                                                                                                                                                                             | P05452                                              | CLEC3B   | TETN  |
| Thrombospondin-1                                                                                                                                                                                                                                                                                        | P07996                                              | THBS1    | TSP1  |
| Thrombospondin-4                                                                                                                                                                                                                                                                                        | P35443                                              | THBS4    | TSP4  |
| Thyroxine-binding globulin                                                                                                                                                                                                                                                                              | P05543                                              | SERPINA7 | THBG  |
| Tissue alpha-L-fucosidase                                                                                                                                                                                                                                                                               | P04066                                              | FUCA1    | FUCO  |
| Tissue factor pathway inhibitor;Isoform Beta of Tissue factor pathway inhibitor                                                                                                                                                                                                                         | P10646;P10646-2                                     | TFPI     | TFPI1 |
| Transferrin receptor protein 1                                                                                                                                                                                                                                                                          | P02786                                              | TFRC     | TFR1  |
| Transforming growth factor-beta-induced protein ig-h3                                                                                                                                                                                                                                                   | Q15582                                              | TGFBI    | BGH3  |
| Transgelin-2;Isoform 2 of Transgelin-2                                                                                                                                                                                                                                                                  | P37802;P37802-2                                     | TAGLN2   | TAGL2 |
| Trans-Golgi network integral membrane protein 2;Isoform TGN48 of Trans-Golgi network integral membrane protein 2;Isoform 4 of Trans-Golgi network integral membrane protein 2;Isoform 5 of Trans-Golgi network integral membrane protein 2;Isoform 7 of Trans-Golgi network integral membrane protein 2 | O43493;O43493-3;O43493-4;O43493-5;O43493-7          | TGOLN2   | TGON2 |
| Transthyretin                                                                                                                                                                                                                                                                                           | P02766                                              | TTR      | TTHY  |
| Trem-like transcript 1 protein;Isoform 3 of Trem-like transcript 1 protein                                                                                                                                                                                                                              | Q86YW5;Q86YW5-3                                     | TREML1   | TRML1 |
| Tropomyosin alpha-4 chain                                                                                                                                                                                                                                                                               | P67936                                              | TPM4     | TPM4  |
| Trypsin-1                                                                                                                                                                                                                                                                                               | P07477                                              | PRSS1    | TRY1  |

|                                                                                                       |                                            |          |       |
|-------------------------------------------------------------------------------------------------------|--------------------------------------------|----------|-------|
| Trypsin-3;Isoform 2 of Trypsin-3;Isoform 3 of Trypsin-3;Isoform 4 of Trypsin-3;Isoform 5 of Trypsin-3 | P35030;P35030-2;P35030-3;P35030-4;P35030-5 | PRSS3    | TRY3  |
| Tubulin alpha-1B chain                                                                                | P68363                                     | TUBA1B   | TBA1B |
| Tubulin alpha-4A chain;Isoform 2 of Tubulin alpha-4A chain                                            | P68366;P68366-2                            | TUBA4A   | TBA4A |
| Tubulin beta chain                                                                                    | P07437                                     | TUBB     | TBB5  |
| Tubulin beta-1 chain                                                                                  | Q9H4B7                                     | TUBB1    | TBB1  |
| Uncharacterized protein C16orf46;Isoform 2 of Uncharacterized protein C16orf46                        | Q6P387;Q6P387-2                            | C16orf46 | CP046 |
| Uncharacterized protein C19orf57;Isoform 2 of Uncharacterized protein C19orf57                        | Q0VDD7;Q0VDD7-2                            | C19orf57 | CS057 |
| Unconventional myosin-IXb;Isoform Short of Unconventional myosin-IXb                                  | Q13459;Q13459-2                            | MYO9B    | MYO9B |
| Uromodulin;Isoform 3 of Uromodulin;Isoform 4 of Uromodulin;Isoform 5 of Uromodulin                    | P07911;P07911-3;P07911-4;P07911-5          | UMOD     | UROM  |
| Vascular cell adhesion protein 1                                                                      | P19320                                     | VCAM1    | VCAM1 |
| Vasorin                                                                                               | Q6EMK4                                     | VASN     | VASN  |
| Vimentin                                                                                              | P08670                                     | VIM      | VIME  |
| Vinculin;Isoform 1 of Vinculin                                                                        | P18206;P18206-2                            | VCL      | VINC  |
| Vitamin D-binding protein;Isoform 3 of Vitamin D-binding protein                                      | P02774;P02774-3                            | GC       | VTDB  |
| Vitamin K-dependent protein C;Isoform 2 of Vitamin K-dependent protein C                              | P04070;P04070-2                            | PROC     | PROC  |
| Vitamin K-dependent protein S                                                                         | P07225                                     | PROS1    | PROS  |
| Vitamin K-dependent protein Z;Isoform 2 of Vitamin K-dependent protein Z                              | P22891;P22891-2                            | PROZ     | PROZ  |
| Vitronectin                                                                                           | P04004                                     | VTN      | VTNC  |
| von Willebrand factor                                                                                 | P04275                                     | VWF      | VWF   |
| WD repeat-containing protein 1                                                                        | O75083                                     | WDR1     | WDR1  |
| Xaa-Pro dipeptidase;Isoform 2 of Xaa-Pro dipeptidase;Isoform 3 of Xaa-Pro dipeptidase                 | P12955;P12955-2;P12955-3                   | PEPD     | PEPD  |
| Zinc finger homeobox protein 3                                                                        | Q15911                                     | ZFHX3    | ZFHX3 |

|                                                                                                                                            |                                   |       |      |
|--------------------------------------------------------------------------------------------------------------------------------------------|-----------------------------------|-------|------|
| Zinc finger protein DPF3;Isoform 2 of Zinc finger protein DPF3;Isoform 3 of Zinc finger protein DPF3;Isoform 5 of Zinc finger protein DPF3 | Q92784;Q92784-2;Q92784-3;Q92784-5 | DPF3  | DPF3 |
| Zinc-alpha-2-glycoprotein                                                                                                                  | P25311                            | AZGP1 | ZA2G |
| Zyxin                                                                                                                                      | Q15942                            | ZYX   | ZYX  |

**SDC Fig. 1. OPLS model of PPT post exercise in FM, and STRING protein network.** **a)** Score plot showing group separation among FM based on PPT, the larger square the higher PPT score. **b)** Loading plot showing significant proteins with  $VIP \geq 1.0$ , and a  $p(\text{corr}) \geq 0.75$ . In total, 40 proteins were associated with low PPT in FM. **c)** Enriched protein network of significant proteins. The color nodes represent the following: red = metabolic process, and green = immune system process. Abbreviated protein names in loading plot and STRING network are stated in SDC Table 2. PPT: Pressure pain thresholds; FM: Fibromyalgia.

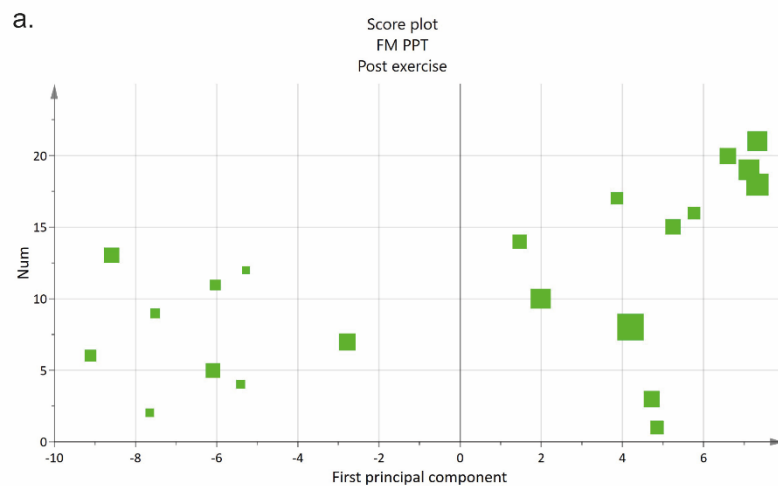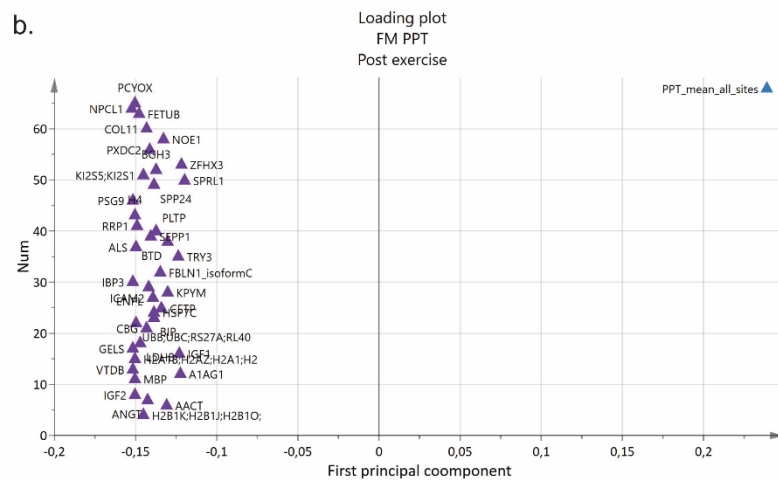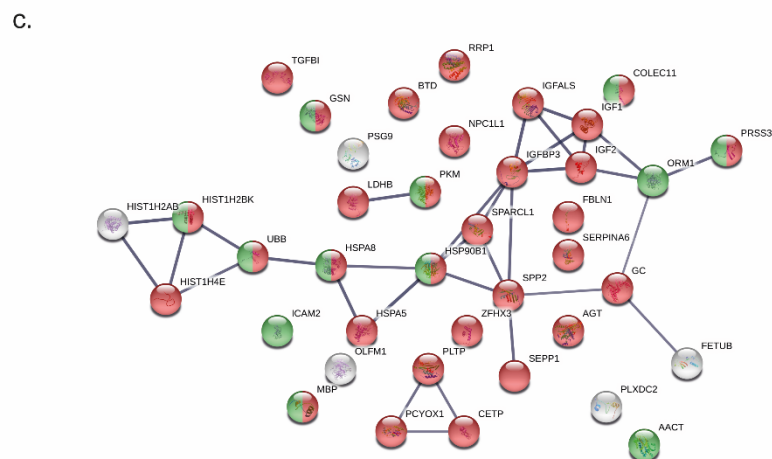

### **Potential subgroups of FM related to clinical characteristics and exercise variables**

A within-group separation could be seen in the FM group both at baseline (Fig. 1 a, Score plot) and post exercise (Fig. 2 a, Score plot). To get an overview and compare the proteome profile at baseline and post exercise in FM alone, a PCA was performed including all proteins from both time points (SDC Fig. 2). The PCA consisted of two significant PCs with a  $R^2 = 0.53$  and  $Q^2 = 0.38$ . A clear separation in the plasma proteome profile was noted between baseline and post exercise (SDC Fig. 2b, loading plot) as well as a subgroup division within FM (SDC Fig. 2 a, score plot). To further evaluate the differences between the two subgroups of FM patients (classified as subgroup 1 and 2) seen in the PCA analysis (SDC Fig. 2, score plot) and in the score plots of the two OPLS-DA models (Fig. 1 and 2), background and exercise-related data were first compared. At baseline, significant differences existed between the two groups in FM duration, number of tender points, and mental fatigue (SDC Fig. 3). At post exercise, the two groups showed a significant difference in PPT. Hence, a significant improvement existed post exercise of the exercise-related variables SixMWT, knee extension force, handgrip force, and elbow strength (right side) in subgroup 2 but not in subgroup 1 of FM.

**SDC Fig. 2. PCA of comparative plasma proteomics baseline and post exercise in FM. a)** The score plot shows with-in group separation in FM performing resistance exercise. Two subgroups were identified and named subgroup 1 and subgroup 2. **b)** The loading plot shows all identified plasma proteins at baseline and post exercise. Abbreviated protein names in loading plot are stated in Supplementary Digital Content Table 2.

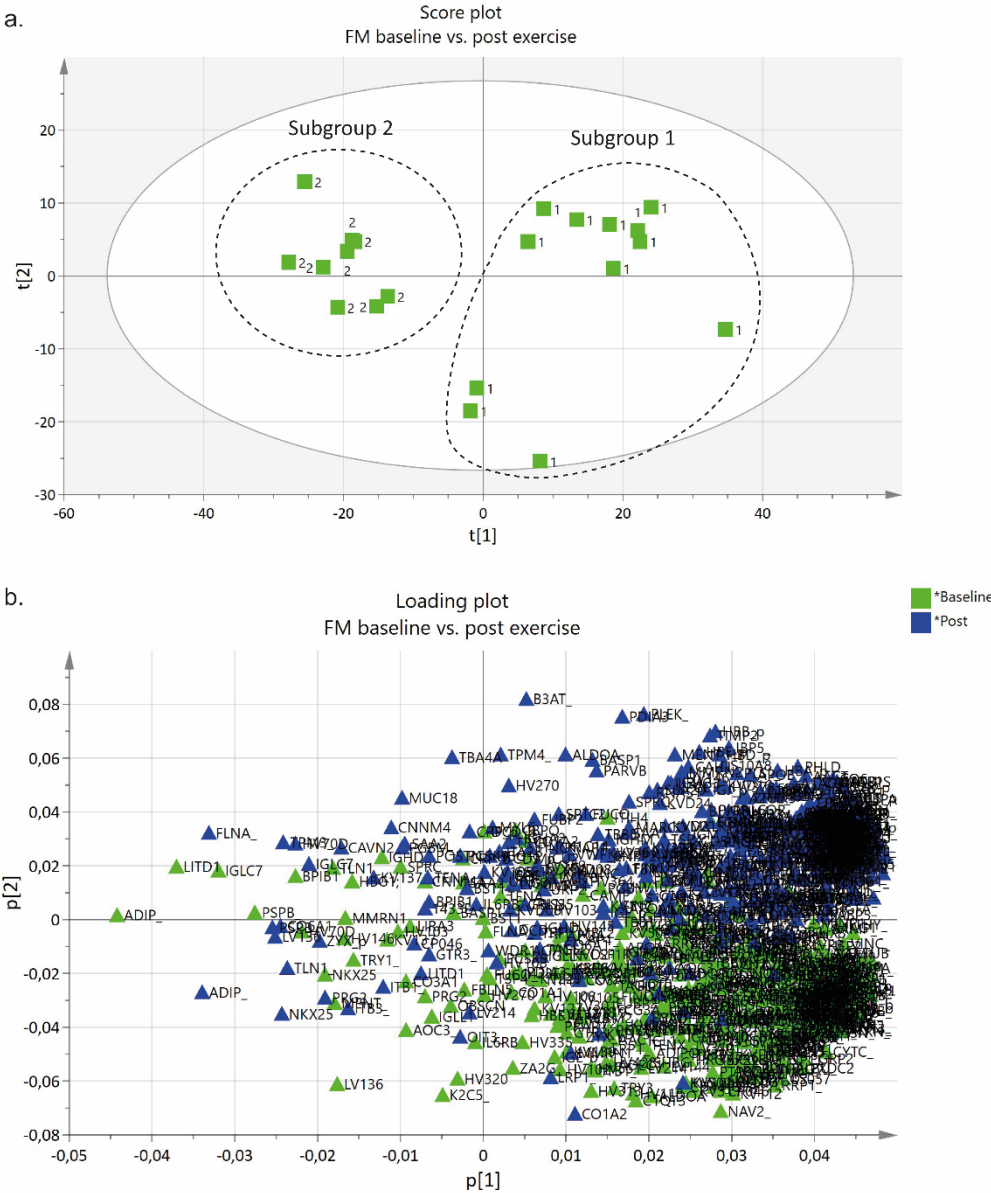



**SDC Fig. 3. Subgroup division in FM.** Background data and exercise-related variables of the two subgroups 1 and 2 based on score plot from PCA (SDC Fig. 2). MFI: Multidimensional Fatigue Inventory; CPAQ: Chronic pain acceptance questionnaire; PCS: Pain Catastrophizing Scale; PPT: Pressure pain thresholds; SixMWT: Six-minute walk test. \* =  $P < 0.05$ , \*\* =  $P < 0.01$

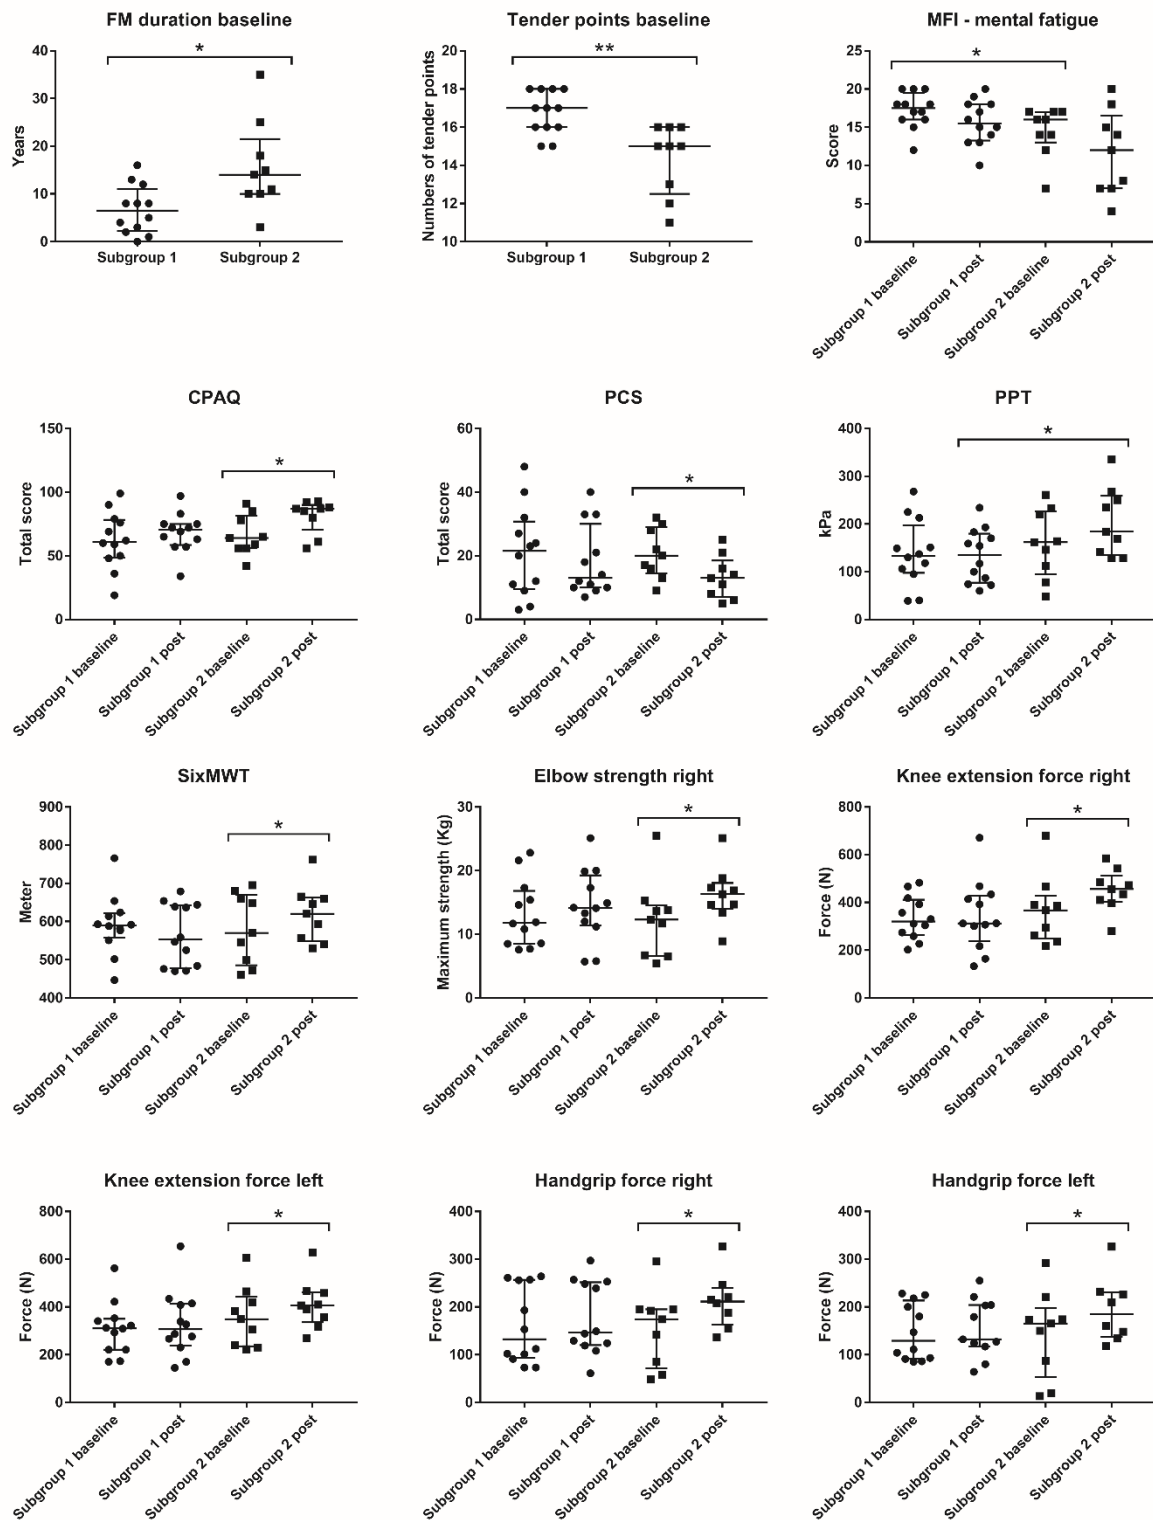

### **OPLS modeling of FM subgroups and FM duration at baseline**

When including all FM participants at baseline, the OPLS model was not significant (1 PC, 1 OC,  $R^2 = 0.67$ ,  $Q^2 = 0.39$ , CV-ANOVA  $P$ -value = 0.09). However, when dividing them according to the FM subdivision seen in the score plot of the OPLS-DA model (Fig. 1 a) and PCA analysis (SDC Fig. 2), both models were separately significant. The OPLS model including subgroup 1 with shorter FM duration (median (IQR), 8 (7.8) years) had the model statistics 1 PC, 2 OC,  $R^2 = 0.96$ ,  $Q^2 = 0.76$ , CV-ANOVA  $P$ -value = 0.001. The OPLS model including subgroup 2 with longer FM duration (Median (IQR), 15 (6) years) had 1 PC, 1 OC,  $R^2 = 0.92$ ,  $Q^2 = 0.50$ , CV-ANOVA  $P$ -value = 0.043 (SDC Fig. 4 a-b). The proteins associated with FM duration were different between the two subgroups. When comparing the two proteome profiles for FM duration using STRING analysis, both models had significantly enriched protein networks (Subgroup 1 PPI enrichment  $P$ -value =  $1.59e-08$ , subgroup 2 PPI enrichment  $P$ -value =  $2.28e-06$ ) with a local average clustering coefficient of 0.432 (subgroup 1) and 0.783 (subgroup 2). Several biological processes with an FDR < 0.05 were present and both networks had proteins related to stress. In subgroup 1 (shorter FM duration) the proteins were further involved in blood coagulation and immune response, whereas in subgroup 2 (longer FM duration) the proteins were involved in leucocyte-mediated immunity, immune system process, and inflammatory response (SDC Fig. 4 c). No significant models were obtained when regressing the knee extension force or handgrip force variables for all FM or when divided into subgroups at baseline.

**SDC Fig. 4. Subgroup division of FM duration at baseline.** OPLS models of FM duration and significant plasma proteins of respective FM subgroup. The subgroup division is based on the score plot of the OPLS-DA model at baseline (Fig. 1 a, upper right quadrant = subgroup 1, and lower right quadrant = subgroup 2). **a)** In the score plot of respective subgroup, the larger the square the longer FM duration. Numbers 1 and 2 shows participant who have performed resistance exercise and which are included in the subgroup division seen in the PCA score plot in SDC Fig. 2 a. **b)** Loading plot of each FM subgroup showing significant protein with VIPpred  $\geq 1.2$  and  $p(\text{corr}) \geq 0.4$ . **c)** Protein network of significant proteins from respective subgroup. The color nodes in subgroup 1 represents: Red = response to stress, yellow = blood coagulation, green = immune response. For subgroup 2 the colored nodes represent: Green = immune system process, blue = inflammatory response, red = response to stress, purple = leucocyte-mediated immunity. Abbreviated protein names in loading plots and STRING networks are explained in SDC Table 2.

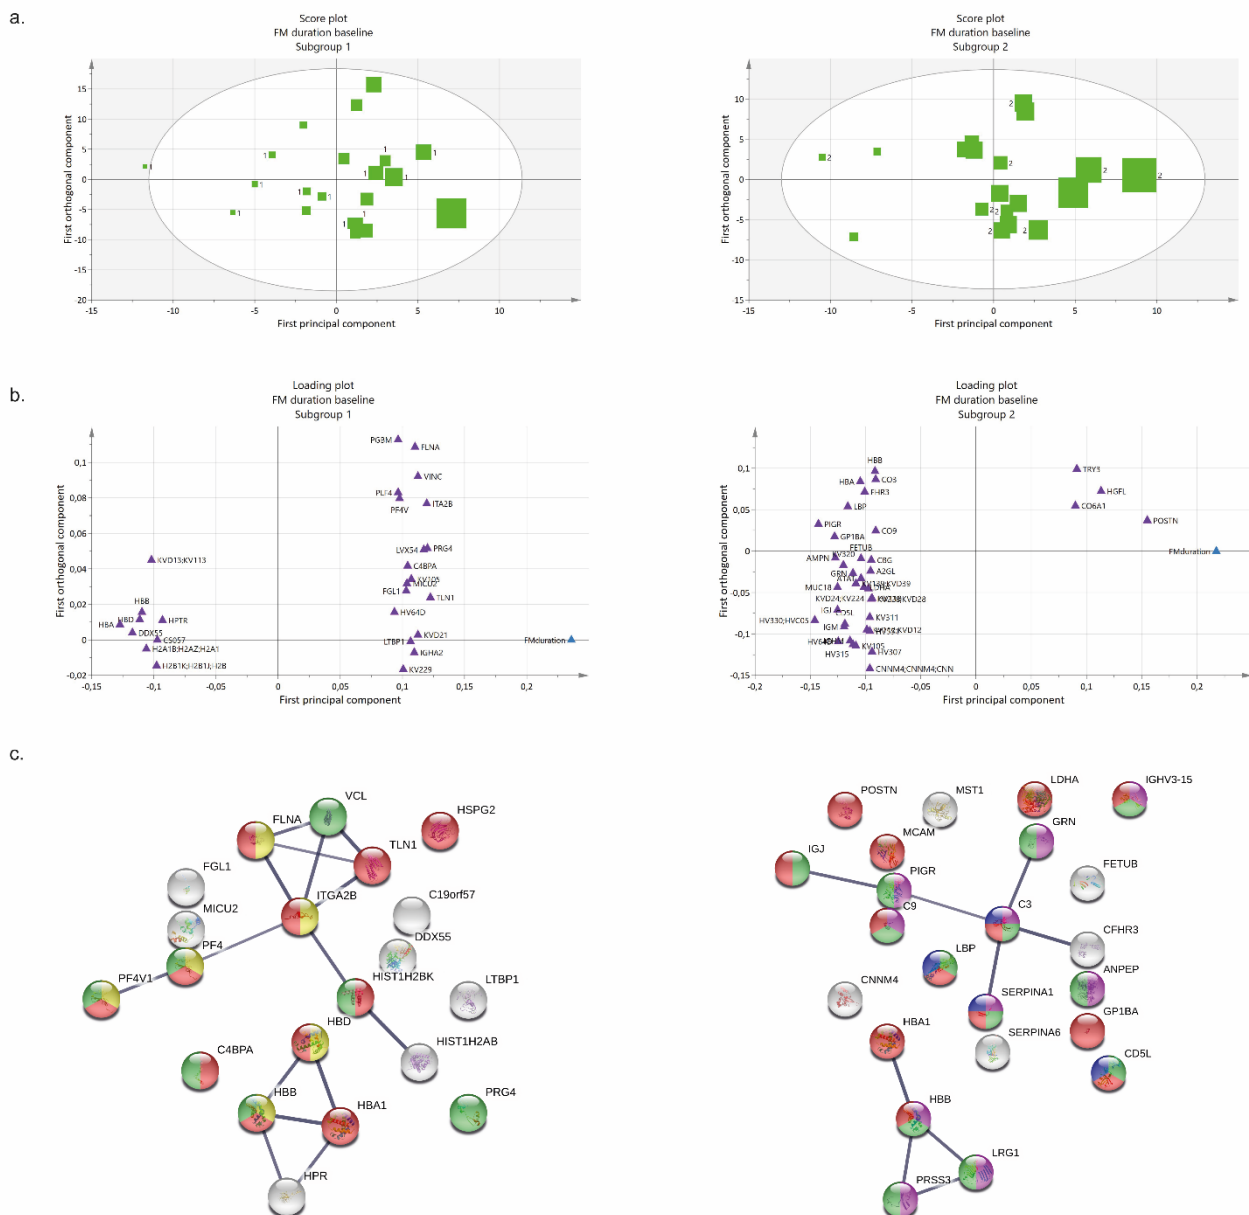

### **OPLS modeling of FM subgroups knee extension force post exercise**

Two significant OPLS models were obtained when investigating subgroup 2 and regression of knee extension force. The model statistics for knee extension force right side were 1 PC,  $R^2 = 0.85$ ,  $Q^2 = 0.72$ , CV-ANOVA P-value = 0.028. The proteins with highest VIPpred ( $\geq 1.42$ ) and  $p(\text{corr}) (\geq 0.82)$  were Isoform 9 of Fibronectin, Sodium- and chloride-dependent transporter XTRP3, Lysosome-associated membrane glycoprotein 2, Platelet factor 4 variant, Tenascin and L-lactate dehydrogenase B chain, and two forms of immunoglobulins. For the left side, the model statistics were 1 PC,  $R^2 = 0.87$ ,  $Q^2 = 0.70$ , CV-ANOVA P-value = 0.046 (SDC Fig. 5 a-b). The proteins with the highest VIPpred ( $\geq 1.44$ ) and  $p(\text{corr}) (\geq 0.72)$  were Flavin reductase (NADPH), Ephrin type-A receptor 1, BPI fold-containing family B member 1, Plasma kallikrein, Platelet factor 4 variant, Pyruvate kinase PKM, Sodium- and chloride-dependent transporter XTRP3, and Insulin-like growth factor-binding protein complex acid labile subunit. To get an overview of which protein processes were involved in the knee extension force models post exercise in FM, all significant proteins from both models were submitted to STRING analysis. In total, 34 proteins were detected, resulting in a significantly enriched network (PPI enrichment P-value =  $1.41e-09$ ) with an average local cluster coefficient of 0.34. Several biological processes with an FDR < 0.05 were identified, including wound healing, tissue development, and inflammatory response (SDC Fig. 5 c).

**SDC Fig. 5. OPLS models of knee extension force post exercise subgroup 2 including protein network.** **a)** Score blot of knee extension force mean right and left side for subgroup 2 (with longer FM duration). The larger the square, the higher knee extension force. **b)** Loading plots of significant proteins with VIPpred  $\geq 1.2$  and  $p(\text{corr}) \geq 0.66$  from each model. **c)** STRING Protein network including all significant proteins from the OPLS model of both right and left side of knee extension force. The colored nodes represent red = wound healing, purple = tissue generation, and blue = inflammatory response. Abbreviated protein names in loading plots and STRING networks are found in SDC Table 2.

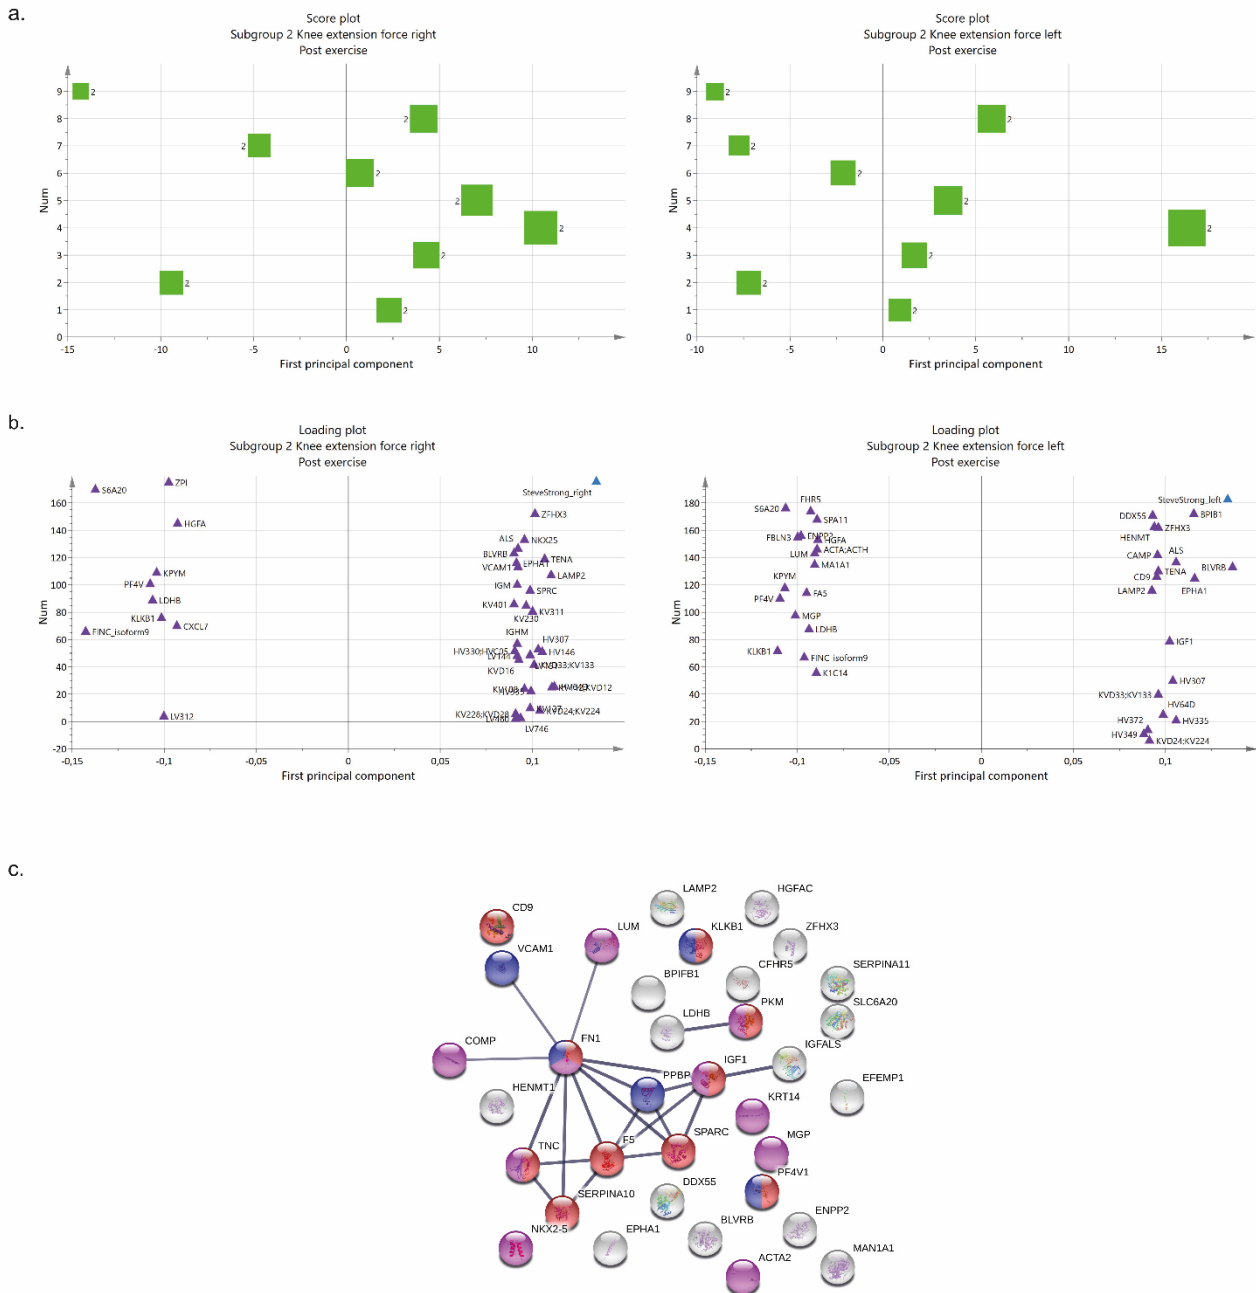

## References

- [11] Larsson A, Palstam A, Lofgren M, Ernberg M, Bjersing J, Bileviciute-Ljungar I, et al. Resistance exercise improves muscle strength, health status and pain intensity in fibromyalgia--a randomized controlled trial. *Arthritis research & therapy*. 2015;17:161. Epub 2015/06/19. doi: 10.1186/s13075-015-0679-1. PubMed PMID: 26084281; PubMed Central PMCID: PMC4489359.
- [20] Ernberg M, Christidis N, Ghafouri B, Bileviciute-Ljungar I, Lofgren M, Bjersing J, et al. Plasma Cytokine Levels in Fibromyalgia and Their Response to 15 Weeks of Progressive Resistance Exercise or Relaxation Therapy. *Mediators of inflammation*. 2018;2018:3985154. Epub 2018/06/01. doi: 10.1155/2018/3985154. PubMed PMID: 29849487; PubMed Central PMCID: PMC5932448.
